# PLASTIDIC $\Delta 6$ FATTY-ACID DESATURASES WITH DISTINCTIVE SUBSTRATE SPECIFICITY REGULATE THE POOL OF C18-PUFAS IN THE ANCESTRAL PICOALGA *OSTREOCOCCUS TAURI*

Charlotte Degraeve-Guilbault C.<sup>1\*</sup>, Rodrigo E. Gomez.<sup>1\*</sup>, Cécile. Lemoigne<sup>1\*</sup>, Nattiwong Pankansam<sup>2</sup>, Soizic Morin<sup>4</sup>, Karine Tuphile<sup>1</sup>, Jérôme Joubès<sup>1</sup>, Juliette Jouhet<sup>3</sup>, Julien Gronnier<sup>1</sup>, Iwane Suzuki<sup>2</sup>, Frédéric Domergue<sup>1</sup> and Florence Corellou<sup>1#</sup>

1. Laboratoire de Biogenèse Membranaire, UMR5200 CNRS-Université de Bordeaux, Villenave d'Ornon, France

2. Faculty of Life and Environmental Sciences, University of Tsukuba, Tsukuba, Japan

3. Laboratoire de Biologie Cellulaire et Végétale, UMR 5168, CNRS-CEA-INRA-Université Grenoble Alpes, IRIG, Grenoble, France

4. INRAE, UR EABX, F-33612, Cestas, France

\* Authors contributed equally

# Corresponding author: [florence.corellou@u-bordeaux.fr](mailto:florence.corellou@u-bordeaux.fr)

**Short title:** plastidic  $\Delta 6$ -desaturase in the green lineage

**One sentence summary:** *Osteococcus tauri* plastidic lipid C18-PUFA remodelling involves two plastid-located cytochrome-b5 fused  $\Delta 6$ -desaturases with distinct preferences for both head-group and acyl-chain.

## Footnotes:

### Author Contributions

CDG performed the work and analyses on *O. tauri* (cloning, transgenic screening, HP-TCL, GC-FID, MS/MS); RD performed the work and analyses on *N. benthamiana* OE (cloning, agro-transformation, FAMES analysis); CL performed most of the lipid analyses of *O. tauri* and *N. benthamiana* (agro-transformation, HP-TLC, GC-FID); NP performed the work and analysis on *Synechocystis* (transformation, screening, TCL, GC-FID); SM designed,

performed and analyzed the photosynthesis experiments; KT performed cloning and qPCR experiments; JeJ performed the work on DES localization and qPCR analyses; JuJ performed MS/MS analyses; JG performed the work on DES localization; IS supervised the work on *Synechocystis*; FD performed and supervised the work on *N. benthamiana*, helped to organize the MS; FC designed, supervised and performed the research, analyzed the data (*O. tauri*, *N. benthamiana*, *Synechocystis*), wrote the paper.

The authors responsible for distribution of materials integral to the findings presented in this article in accordance with the policy described in the Instructions for Authors are: Florence Corellou, [florence.corellou@u-bordeaux.fr](mailto:florence.corellou@u-bordeaux.fr) and Iwane Suzuki, [iwanes6803@biol.tsukuba.ac.jp](mailto:iwanes6803@biol.tsukuba.ac.jp) concerning *Synechocystis* PCC 6803 lines.

## ABSTRACT

Eukaryotic  $\Delta 6$ -desaturases are microsomal enzymes which balance the synthesis of  $\omega$ -3 and  $\omega$ -6 C18-polyunsaturated-fatty-acids (PUFA) accordingly to their specificity. In several microalgae, including *O. tauri*, plastidic C18-PUFA are specifically regulated by environmental cues suggesting an autonomous control of  $\Delta 6$ -desaturation of plastidic PUFA. Sequence retrieval from *O. tauri* desaturases, highlighted two putative  $\Delta 6/\Delta 8$ -desaturases sequences clustering, with other microalgal homologs, apart from other characterized  $\Delta$ -6 desaturases. Their overexpression in heterologous hosts, including *N. benthamiana* and *Synechocystis*, unveiled their  $\Delta 6$ -desaturation activity and plastid localization. *O. tauri* lines overexpressing these  $\Delta 6$ -desaturases no longer adjusted their plastidic C18-PUFA amount under phosphate starvation but didn't show any obvious physiological alterations. Detailed lipid analyses from the various overexpressing hosts, unravelled that the substrate features involved in the  $\Delta 6$ -desaturase specificity importantly involved the lipid head-group and likely the non-substrate acyl-chain, in addition to the overall preference for the  $\omega$ -class of the substrate acyl-chain. The most active desaturase displayed a broad range substrate specificity for plastidic lipids and a preference for  $\omega$ -3 substrates, while the other was selective for  $\omega$ -6 substrates, phosphatidylglycerol and 16:4-galactolipid species specific to the native host. The distribution of plastidial  $\Delta 6$ -desaturase products in eukaryotic hosts suggested the occurrence of C18-PUFA export from the plastid.

## INTRODUCTION

Marine microalgae synthesize peculiar polyunsaturated fatty-acids including hexatetraenoic acid, (16:4<sup>Δ4,7,10,13</sup> HTA), stearidonic acid (SDA, 18:4<sup>Δ6,9,12,15</sup>), octapentaenoic acid (OPA18:5<sup>Δ3,6,9,12,15</sup>) as well as very-long-chain polyunsaturated-fatty-acids (VLC-PUFA) (Khozin-Goldberg *et al.*, 2016; Jonasdottir, 2019). Due to overfishing and pollution, microalgae are regarded as a sustainable alternative for the production of health-beneficial PUFA inefficiently produced by vertebrates, such as SDA and docosahexaenoic acid (DHA, 22:6<sup>Δ4,6,9,12,15</sup>). However, still little is known about the molecular regulation of PUFA synthesis in microalgae. SDA and  $\gamma$ -linolenic acid (GLA, 18:3<sup>Δ6,9,12</sup>) are the  $\Delta$ 6-desaturation products of  $\alpha$ -linolenic acid (ALA, 18<sup>Δ9,12,15</sup>), and of linoleic acid (LA, 18:2<sup>Δ9,12</sup>), respectively. The substrate preference of  $\Delta$ 6-desaturase (DES) is considered as the main switch to direct C18-PUFA flows towards the  $\omega$ -3 or the  $\omega$ -6 pathways (Shi *et al.*, 2015). The  $\omega$ -3-desaturation of  $\omega$ -6 substrates establishes a further link between the  $\omega$ -6 and  $\omega$ -3 pathway in lower eukaryotes (Wang *et al.*, 2013). FA fluxes between lipids and compartments, including cytosolic lipids droplets, are also known to participate in PUFA-remodeling of structural lipid, though knowledge about these fluxes in microalgae remains scarce (Li-Beisson *et al.*, 2015; Li, N *et al.*, 2016).

Nutrients and abiotic stresses regulate the PUFA content of cyanobacteria and microalgae (Los *et al.*, 2013; Khozin-Goldberg *et al.*, 2016; Kugler *et al.*, 2019). In particular, C18-PUFA from plastidic lipids are highly remodeled in response to abiotic stresses; in the cyanobacteria *Synechocystis* sp. PCC6803, ALA and SDA synthesis is triggered by chilling while in several species from the Chromista kingdom OPA is either increased or redistributed within molecular species (Tasaka *et al.*, 1996; Kotajima *et al.*, 2014; Leblond *et al.*, 2019). As plants, green microalgae display a high amount of  $\alpha$ -linolenic acid (ALA, 18:3<sup>Δ9,12,15</sup>) and further the peculiar FA, 16:4<sup>Δ4,7,10,13</sup> which is typical of the Chlorophyta phylum (Lang *et al.*, 2011). Major microalga classes from the Chromista kingdom, such as haptophytes and dinoflagellates, produce both OPA and DHA which are not synthesized by green microalgae. SDA is usually predominant in those species and required for both the synthesis of OPA found in galactolipids and of  $\omega$ -3 VLC-PUFA, including DHA (Jonasdottir, 2019; Peltomaa *et al.*, 2019).

*Ostreococcus tauri* is an ancestral green picoalga that emerged early after the divergence between Chlorophyta and Streptophyta (land plants) (Courties *et al.*, 1994; Chrétiennot-Dinet *et al.*, 1995; Leliaert *et al.*, 2012). It has the most minimal genomic and cellular organization (Derelle *et al.*, 2006). This coccoid cell is smaller than 2  $\mu\text{m}$  (picoeukaryote), lacks cell-wall, flagella, as well as an obvious sexual life (Grimsley *et al.*, 2010). However, it displays a large panel of PUFA, including HTA, ALA, SDA, OPA and DHA as main components (Wagner *et al.*, 2010). *O. tauri* glycerolipid characterization unveiled a clear-cut allocation of PUFA in membranes, with C18-PUFA prevailing in plastidic lipids, OPA being restricted to galactolipids, and VLC-PUFA exclusively found in the extraplastidic lipids consisting of the betain lipid diacylglyceryl-hydroxymethyl-trimethyl- $\beta$ -alanine (DGTA) and the phosphosulfolipid phosphatidyl-dimethylpropanethiol (PDPT) (Degraeve-Guilbault *et al.*, 2017). We further showed that nutrient starvation resulted in the increase of ALA at the expense of SDA in plastidic glycerolipids and reverberated in the acyl-CoA pool and in triacylglycerols (TAG) with no significant impact in extraplastidic glycerolipids. The sole  $\Delta 6$ -DES previously characterized from *O. tauri* (and related species from the class *Mamiellophyceae*) uses acyl-CoA instead of acyl-lipid as substrates, in contrast to other  $\Delta 6$ -DES from lower eukaryotes (Domergue *et al.*, 2005). We reasoned that the regulation of the plastidic C18-PUFA pool involves uncharacterized acyl-lipid  $\Delta 6$ -DES, rather than a transfer of  $\Delta 6$ -desaturation products from the acyl-coA pool to the chloroplast.

In this work, we identified two novel acyl-lipid  $\Delta 6$ -DES, which were plastid located, accepted plastidic lipids as substrates, and displayed distinctive specificities depending on overlapping substrate features. Together with putative homologs from the Chromista and Kinetoplastida lineages, these  $\Delta 6$ -DES cluster apart from the previously characterized  $\Delta 6$ -DES. The discovery of plastidic  $\Delta 6$ -DES and the impact of their overexpression in *O. tauri* points out the requirement of tight regulation of the C18-PUFA pool in microalgae. (Lee *et al.*, 2016; Li, D *et al.*, 2016). The strategy used in this study further illustrates how overexpression in several host systems of distinctive glycerolipid composition gives insight into DES substrate specificity.

## RESULTS

### *O. tauri* fatty acid desaturase sequences retrieval and analysis

Thirteen canonical DES sequences were retrieved from genomic and transcriptomic databases (NCBI databases). All sequences were manually checked upstream of the predicted start codon, especially in order to assess the N-terminal (Nt) part of the proteins, and extended ORF were validated by cDNA amplification (Table S1, Table S2). Exception made of the acyl-CoA- $\Delta 6$ -DES and an unknown DES barely related to sphingolipid  $\Delta 3/\Delta 4$ -DES, all DES were predicted to contain a chloroplastic target-peptide (cTP) (Tardif *et al.*, 2012). Among the seven front-end DES three uncharacterized  $\Delta 6/\Delta 8$  fatty-acid-DES retained our attention (Table S1, Fig. 1) (Kotajima *et al.*, 2014). One  $\Delta 6$ -DES candidate clustered with acyl-lipid  $\Delta 6/\Delta 8$ -DES and was closest to the diatom *Thalassiosira pseudonana*  $\Delta 8$ -sphingolipid-DES (Tonon *et al.*, 2005). The two other candidates were closely related (49.8% identity, 71.6% similarity) and, together with putative homologs, formed a cluster apart from the typical acyl-CoA  $\Delta 6$ -DES from *Mamiellophyceae* species and acyl-lipid  $\Delta 6/\Delta 8$ -DES from plants, fungi and worms (Fig. 1A, Fig. S1 to S4). These two candidates had each one homolog in the *Mamiellophyceae* species (exception made of *Bathycoccus prasinos*) (Fig. S2, Fig. S3). More distantly related homologs occurred in microalgae arising from secondary endosymbiosis, i.e., species from the Chromista and Euglenozoa supergroup and not in the green lineage (Fig. S4). All homologous sequences displayed the typical Nt-fused-Cyt-b5 domain found in front-end DES. Three His-Boxes, which are known to be involved in both DES activity and specificity, were conserved (Fig. 1B, Fig. S2 to Fig. S4) (Sayanova *et al.*, 1997; López Alonso *et al.*, 2003). Consensus motifs emerging from alignments corresponded to xHDYxHGRx, WWSxKHNxHH, and QLEHHFLP with a larger conserved region upstream of this latter motif, and showed clearly divergent amino acid signature compared to the acyl-CoA- $\Delta 6$ -DES His-Boxes (QHEGGHSSL, WNQMHNKHH, QVIHHLFP) (Fig.1B, Fig. S2 to S4) (López Alonso *et al.*, 2003). *O. tauri* acyl-CoA- $\Delta 6$ -DES was previously characterized in yeast and extensively used for VLC-PUFA reconstruction pathway in various organisms including plants (Domergue *et al.*, 2005; Hoffmann *et al.*, 2008; Ruiz-López *et al.*, 2012; Hamilton *et al.*, 2016). However, its activity has never been assessed in the native host; The acyl-CoA - $\Delta 6$ -DES was therefore chosen as a reference to achieve the functional characterization of the two closely related  $\Delta 6/\Delta 8$ -DES candidates. According to their genomic accessions, these

candidates will be referred to as Ot05 and Ot10 and the acyl-CoA- $\Delta$ 6-DES to as Ot13 (Table S1).

## $\Delta$ 6-DES-candidate localization and activities in heterologous hosts

Full-length ORF or codon-optimized and ORF Nt-truncated, for removing the putative cTP, were expressed in *S. cerevisiae*. Neither the supply of  $\Delta$ 6-substrates nor of  $\Delta$ 8-substrates resulted in the detection of any products. The transformation efficiency was assessed by co-transformation of candidates with the acyl-CoA  $\Delta$ 6-DES, which results in the synthesis of  $\Delta$ 6-products from supplied  $\Delta$ 6-substrates (Fig. S5). We therefore overexpressed full-length proteins in *N. benthamiana* to assess their sub-cellular localization and test their putative  $\Delta$ 6-desaturation activity on the endogenous substrates 18:3n-3 and 18:2n-6. The two putative p $\Delta$ 6-DES Ot05 and Ot10 fused to the -yellow fluorescent protein (Ct-YFP) exclusively localized at plastids, while the acyl-CoA- $\Delta$ 6-DES-YFP was at the ER (Fig. 2A). Expression of either fused and non-fused  $\Delta$ 6-DES candidates and acyl-CoA- $\Delta$ 6-DES resulted in the synthesis of the  $\Delta$ 6-desaturation products 18:3n-6 and 18:4n-3 (Fig. 2B, Fig. S6A). These results unambiguously demonstrated that both Ot05 and Ot10 are plastidic  $\Delta$ 6-DES. A clear trend emerged from the variation of the  $\omega$ -3 and  $\omega$ -6 C18-PUFA ratio in individual replicates (Fig. 2B, Fig. S6B).; The 18:4n-3/18:3n-3 ratio was higher in Ot05 overexpressors (Ot05-OE) while the 18:3n-6/18:2n-6 ratio was increased in Ot10-OE and especially Ot13-OE. This suggests that Ot05 preferentially accepted  $\omega$ -3 substrates while the specificity of Ot10 was higher for  $\omega$ -6 substrates. The  $\omega$ -3 and  $\omega$ -6 C18-PUFA ratio was also used to readily compare the relative impact on glycerolipid classes of each  $\Delta$ 6-DES-OE independently of the overall activity (Fig. 2C, Fig. S7). As a result, extraplastidic phospholipids (phosphatidylcholine PC, Phosphatidic Acid, PA, and phosphatidylethanolamine PE) were mostly impacted in the Ot13-OE (acyl-CoA- $\Delta$ 6-DES) and the  $\omega$ -6 ratio 18:3n-6/18:2n-6 was also importantly increased in MGDG. The extraplastidic lipids were affected to a lesser extent in the p $\Delta$ 6-DES-OE Ot05 and Ot10 (Fig. 2C). Most interestingly, monogalactosyl diacylglycerol (MGDG) was the most altered lipid class in Ot05-OE, while in Ot10-OE, PG showed the highest increase of  $\Delta$ 6-products/ $\Delta$ 6-substrates ratio in Ot10-OE. Impact on sulfoquinovosyl diacylglycerol (SQDG) and digalactosyl diacylglycerol (DGDG) was greater in Ot05-OE compared to the two other OE. Interestingly, disrupting the heme-binding capacity of Cyt-b5 by H>A mutation in the



HPGG motif, abolished the activity of both plastidic  $\Delta 6$ -DES (p $\Delta 6$ -DES) (Sayanova *et al.*, 1999) (Fig. S6C).

To further clarify the substrate specificity of p $\Delta 6$ -DES, the cyanobacterium *Synechocystis* PCC 6803 was used. This organism not only encompasses the eukaryotic classes of plastidic lipids as major glycerolipids but also allows transgene expression from a similar genomic environment (homologous recombination). *Synechocystis* PCC 6803 has a  $\Delta 6$ -DES (*desD*) and a  $\omega$ -3-DES (*desB*). In wild type (WT), the selectivity of DesD for galactolipids is reflected by the exclusive distribution of 18:3n-6 in galactolipids. The transcription of *desB* is induced at temperatures below 30°C and results in 18:3n-3 accumulation in PG and SQDG, and of 18:4n-3 in galactolipids. Note that all glycerolipid species are *sn-1/sn-2* 18:X/16:0 combinations.

Complementing either Ot05 or Ot10 in  $\Delta$ *desD* cells of *Synechocystis* at 34°C (no endogenous  $\omega$ -3-DES activity) resulted in 18:3n-6 production at the expense of 18:2n-6 (Fig. 3A). Similar to experiment in *N. benthamiana*, overexpression of H/A mutated version of the  $\Delta 6$ -DES resulted in the absence of  $\Delta 6$  product, indicating that the integrity of the HPGG motif in the Cyt-b5 domain is required. Ot05 overexpression restored the WT FA-profile, while Ot10 overexpression relatively weak effect. Most interestingly, accumulation of 18:3n-6 occurred not only in galactolipids but was also detected in SQDG for Ot05-OE and in PG for both Ot05-OE and Ot10-OE (Fig. 3B, Fig. 3C, Fig. 3D). Noteworthy, 18:3n-6 accumulation in PG for Ot10-OE was twice as high as that for Ot05-OE, and an isomer of 18:2, likely corresponding to the  $\Delta 6$  desaturation product of 18:1n-9, was further specifically produced (Fig. 3D). Since no acyl-editing unlikely occurs in cyanobacteria, these evidences support that in addition to galactolipids, SQDG and PG are substrates of Ot05, and PG is a preferential substrate of Ot10.

*DesB* induction where *Synechocystis* was grown at 24°C led to 18:3n-3 synthesis and further 18:4n-3 accumulation in galactolipids. The increase of 18:3n-6 at the expense of 18:2n-6 reflects that the endogenous  $\Delta 6$ -desaturation of 18:2n-6 is favored and that  $\omega$ 3-desaturation is a limiting step for 18:4n-3 production in WT (Fig. 3E). Overexpression of *O. tauri* p $\Delta 6$ -DES restored the production of 18:4n-3 in the  $\Delta$ *desD* background to a similar degree in Ot10-OE as in WT, and to a greater extent in Ot05-OE (Fig. 3E). By comparing the profiles of Ot05-OE with WT, it appeared that 18:3n-6 was decreased to a greater extend and



that 18:3n-3 was depleted, indicating that the 18:2n-6, 18:3n-3, 18:4n-3 route prevailed over the 18:2n-6, 18:3n-6, 18:4n-3 route. This is coherent with the results obtained in *N. benthamiana*. Interestingly, 18:4n-3 not only accumulated in galactolipids of both pΔ6-DES OE, but was also detected in PG-species and specifically in SQDG for Ot05-OE (3% of SQDG species) (Fig. 3F, Fig. 3G, Fig. 3H). While 18:X/16:0 galactolipids and SQDG species appeared to be converted more efficiently by Ot05, 18:3n-3-PG seems to be equally well accepted by both pΔ6-DES (Fig. 3D, Fig. 3H).

## Δ6-DES overexpression in *Ostreococcus tauri*

To gain insight into the regulation of C18-PUFA pool by Δ6-DES in the native host, *O. tauri* overexpressors of each Δ6-DES were created using the pOtOXLuc vector (Moulager *et al.*, 2010).

## Screening and selection of Δ6-DES transgenic lines

Phosphate limitation is required for the maximal activity of the high-affinity-phosphate-transporter promoter (promHAPT) driving transgene overexpression. Furthermore, phosphate limitation has been previously shown to enhance the accumulation of 18:3n-3 at the expense of 18:4n-3 in WT (Degraeve-Guilbault *et al.*, 2017). Transgenics for each of the Δ6-DES were screened by luminescence recording of the luciferase reporter gene (promCCA1:Luc) and their FA-profiles were further assessed (Fig. S8). Five transgenics with various phenotypes were selected to ascertain the FA-profile and the transgene expression level (Fig. S9). The transgenics displaying the highest luminescence levels showed the most pronounced alterations regarding the amount of C18-PUFA (Fig. 4). In Ot05 transgenics lines 5-3, 5-4 and 5-5, 18:4n-3 was greatly increased at the expense of 18:3n-3, and a less drastic increase of the down-product 18:5n-3 was observed. These variations on ω-3-C18-PUFA were less pronounced in the best Ot10 transgenics (10-2, 10-5), while the impact of Ot05 and Ot10 overexpression on ω-6-C18-PUFA was comparable (Fig. 4A, 4B and 4C, Fig. S9B). Only minor alterations, consisting mainly of 18:3n-3 reduction, were observed for Ot13-OE (Fig. 4, Fig. S9). Additional changes, such as a decrease of 16:4n-3 and a slight increase of 20:4n-6, were observed in the best pΔ6-DES-OE (Fig. S9, Fig. 4D). One representative overexpressor for each Δ6-DES was chosen (Ot05-5, Ot10-5, and Ot13-5, which displayed a similar level of

transgene expression) were further used for detailed analysis (Fig. 4D, Fig. S10A). These overexpressors grew similarly as control lines (Fig S10B).

### *Lipidic features of selected Δ6-DES overexpressors*

For Δ6-DES OE, minor changes were observed in the proportion of lipid classes consisting mainly of an increased accumulation of TAG, mostly at the expense of MGDG (Fig. S10C). As expected, plastidic lipid FA-profiles were greatly impacted by pΔ6-DES overexpression while only slightly by the acyl-CoA-Δ6-DES overexpression (Fig. 5). Overall FA variations in plastidic lipids followed a similar trend in both pΔ6-DES-OE: ω-6-C18-PUFA were equally impacted in Ot05-OE and Ot10-OE, while the accumulation of 18:4n-3 or of its Δ3-desaturation product 18:5n-3 in 18:5/16:4-MGDG was greater for Ot05-OE (Fig. 5A, B). Ot05-OE also displayed a specific and important decrease of the relative amount of 16:4n-3 in DGDG that was paralleled by an increase of 16:0; however the proportion of 16:4n-3 remained stable in MGDG (Fig. 5A, 5C). Most interestingly molecular species analysis unveiled that the differences between Ot05-OE and Ot10-OE were enhanced for the DGDG species 32:4, 34:4 (18:X/14:0, 18:X-16:0) and the SQDG species 34:4. The relative accumulation of 18:4/saturated fatty-acid combinations in Ot05-OE (ratio to control line) was more than twice as high in DGDG and three times higher in SQDG as for Ot10-OE (Fig. 5D, 5F). In contrast, the variations of C18-PUFA from unsaturated galactolipids species were close to one another in Ot05-OE and Ot-10-OE.

Extraplastidic structural lipids showed modest alterations consisting mainly of a 30% increase of the proportion of 20:4n-6 in the three Δ6-DES OE (Fig. 5G). Under phosphate limitation, DGTA is the prevailing extraplastidic structural lipid (Degraeve-Guilbault *et al.*, 2017) (Fig. S11A, S11B). A specific increase of 18:4n-3 was observed in DGTA for Ot05-OE and was likely relying on the increase of the species 32:4 which includes 14:0/18:4-DGTA (Fig. 5G, Fig. S11C). Similar to the phenotype observed in DGDG, 16:4n-3 was more importantly decreased in Ot05-OE. Several molecular species specifically decreased in Ot05-OE, including 36:8 (putatively 20:4/16:4), 30:4 (14:0/16:4), and 38:10 (22:6/16:4), might account for the overall 16:4 decrease.

Overexpression of each of the three Δ6-DES-OE importantly impacted the FA-profile and molecular species of TAG (Fig. 5H, Fig. S12, S13). Notably for Ot13-OE, the clear alteration

of the ratio  $\Delta 6$ -DES-substrates /  $\Delta 6$ -DES-products in the TAG contrasted with the minor alterations detected in structural lipids. As expected, all 18:4-containing species increased at the expense 18:2- and/or 18:3-TAG species in  $\Delta 6$ -DES-OE: for instance, the major molecular TAG species 48:4, 50:4 increased while the major 48:3, 50:3 species decreased (Fig. S12, S13). Noteworthy, the peculiar species 50:10 (16:4/16:3/18:3 and possibly 16:4/16:4/18:2) and 50:11, (16:4/16:4/18:3) were the second most importantly reduced species. As previously described for DGTA and DGDG, the relative amount of 16:4n-3 was specifically decreased in Ot05-OE, while 16:0 was increased (Fig. 5H). Other alterations specific to Ot05-OE consisted of the reduction of the species 48:7 (includes 16:4/14:0/18:3), 50:6 (includes 16:4/16:0/18:2) and 50:7 (includes 16:4/16:0/18:3), by about half, and the increase of the proportion of 54:10 (includes 18:4/14:0/22:6), 56:9 (includes 18:4/16:0/22:5) and 56:10 (18:4/16:0/22:6) by more than twice. Therefore, the specific 16:0 increase in TAG from Ot05-OE most likely relies on 56:9 and 56:10; these species are 16:0 *sn*-2-TAG species, i.e., TAG species possibly arising from plastidic DAG precursors (Degraeve-Guilbault *et al.*, 2017). Altogether, these observations indicate that FA fluxes toward TAG are differentially affected in the  $\Delta 6$ -DES-OE, and further suggest that 16:4-TAG species, including the peculiar di-16:4 species, are importantly involved in the fine-tuning of C18-PUFA.

### *Physiological relevance of $p\Delta 6$ -DES regulation*

Transcriptional regulation of desaturases is known to occur in response to environmental cues. We therefore assessed transcript levels of desaturases involved in the regulation of C18-PUFA pool by phosphate availability, including the putative  $\omega 3$ -DES (Kotajima *et al.*, 2014). Consistent with our previous report, the proportion of 18:3n-3 was increased by about one half after the transfer of cells to phosphate depleted medium (Fig. 6A). By that time, the transcript level of Ot05 was decreased by more than 60%, the transcripts levels of Ot10 and of the putative  $\omega$ -3-DES remained stable while transcripts of the acyl-CoA DES were rather increased. This result indicates that a decrease in Ot05 activity through transcriptional repression results in lowering the 18:4n-3/18:3n-3 ratio under phosphate deprivation.

Thylakoid membrane PUFA are known to play a role in the regulation of photosynthetic processes (Allakhverdiev *et al.*, 2009). We therefore investigated photosynthetic parameters of  $\Delta 6$ -DES-OE. Nevertheless, no significant changes regarding either photosynthesis efficiency or photoinhibition responses occurred under our conditions (Fig. 6C, S14)

## DISCUSSION

Regulation of C18-PUFA desaturation is required for the FA-profile remodelling of structural lipids in response to chilling in plants and cyanobacteria (Los *et al.*, 2013); downstream synthesis of  $\omega$ -3 and  $\omega$ -6 VLC-PUFA in animals, fungi and microalgae also involves the fine-tuning of C18-PUFA amount notably by  $\Delta$ 6-DES. On the other hand, all front-end  $\Delta$ 6-DES studied so far are demonstrated, or assumed to be located in the ER (Meesapyodsuk & Qiu, 2012). By unveiling the occurrence of plastidic  $\Delta$ 6-DES with distinct substrate selectivity in the ancestral green picoalga *O. tauri* and of putative homologs in Chromista, our results strongly suggest the requirement of an autonomous control of plastidic C18-PUFA in several microalgae species. The entangled substrate features instructing the activity of these two novel  $\Delta$ 6-DES, the possible PUFA fluxes unveiled by  $\Delta$ 6-DES overexpression, as well as the physiological significance of p $\Delta$ 6-DES are discussed.

### Substrate specificity of *O. tauri* $\Delta$ 6-DES

DES specificity relies on intricate substrate features, including the acyl-chain position, length, unsaturation features, and the acyl-carrier nature (Heilmann *et al.*, 2004a; Li, D *et al.*, 2016). Domain swapping between DES of distinctive specificity, together with further amino acid mutation, could highlight the primary importance of His-Box and surrounding region for front-end desaturase activity and substrate specificity (Song *et al.*, 2014; Li, D *et al.*, 2016; Watanabe *et al.*, 2016). However, neither the exact molecular features underlying DES (regio)specificity nor the hierarchical importance of the substrate features are yet clearly identified. Furthermore, assaying plant DES activity in *S. cerevisiae* might have introduced some bias by favoring the activity of microsomal desaturases and/or hampering the proper analysis of plastidic desaturases specificity in the absence of plastidic substrate (Heilmann *et al.*, 2004b).

In this work, four different hosts were used to characterize p $\Delta$ 6-DES substrate specificity. Lipid changes occurring in each of these organisms reflect a steady-state arising from both desaturation and overall FA fluxes. Nevertheless, comparison of lipidic features triggered by overexpression of each  $\Delta$ 6-DES in a given host and of the same  $\Delta$ 6-DES in different hosts allowed to gain insight into p $\Delta$ 6-DES substrate specificity. In 16:3-plants, the Kennedy pathway contributes to the synthesis of plastidic lipid synthesis yielding 18:3/18:3-lipid

species besides *sn-1/sn-2* 18:3/16:3n-3 (Browse *et al.*, 1986b). In *O. tauri*, as in cyanobacteria and other most green microalgae, plastidic lipids correspond to *sn-1/sn-2* 18:X/16:X species. In contrast, *O. tauri* extraplastidic lipids encompass *sn-1/sn-2* SFA/16:4, VLC-PUFA/16:4 and di-homo-VLC-PUFA as major species (Degraeve-Guilbault *et al.*, 2017). These distinctive positional signatures strongly suggest that, in *O. tauri*, plastidic lipids synthesis is independent of ER synthesis. On the other hand, acyl-lipid remodelling of plastidic lipids is assumed to be absent in *Synechocystis* PCC 6803, for which no acyl-turnover was ever reported (Ohlrogge & Browse, 1995). Concerning microalgae, MGDG has been proposed, yet not clearly proven, to be a platform of FA exchange supporting the incorporation of plastidic FA into TAG in *C. reinhardtii* (Li *et al.*, 2012; Kim *et al.*, 2018). The interpretation of our results takes support of this knowledge.

### Head-group specificity

As major changes occurred in galactolipids independently of the host, it can reasonably be concluded that at least MGDG is a substrate of both Ot05 and Ot10. Most interestingly, compared to Ot10 overexpression, Ot05 overexpression in *O. tauri*, *Synechocystis* PCC 6803 and *N. benthamiana* triggered a greater/exclusive accumulation of  $\Delta$ 6-DES products in SQDG whereas Ot10 overexpression in *Synechocystis* PCC 6803 and *N. benthamiana*, led to a greater accumulation of 18:3n-6 in PG. Ot10 overexpression further led to the production of 18:2-PG in *Synechocystis*. Altogether, these results show that Ot05 displayed a broad specificity for plastidic substrates while Ot10 appeared to be selective for PG, at least in heterologous hosts, as well as of some galactolipid species in the native host (see below). Interestingly, the plastidic  $\omega$ -3-DES FAD8 was shown to display a preference for PG compared to the closely related FAD7 in *A. thaliana* (Roman *et al.*, 2015).

Concerning the impact of p $\Delta$ 6-DES overexpression on structural extraplastidic lipids, several evidences support that it most likely arises from the export of overproduced PUFA rather than from the access of p $\Delta$ 6-DES to extraplastidic substrates. Indeed, the absence of desaturation activity in yeast supports that PC is not an accurate substrate (Domergue *et al.*, 2003). Moreover, the fact that *Ostreococcus*  $\Delta$ 5-DES and  $\Delta$ 4-DES, which natural substrates are DGTA and possibly PDPT, displayed a low activity in *S. cerevisiae* supports the importance of the head-group for front-end DES activity (Hoffmann *et al.*, 2008; Ahmann *et al.*, 2011). We therefore propose that the first level of substrate recognition of *O. tauri* p $\Delta$ 6-

DES relies on plastidic lipid head-group. Recently, co-crystallization of the Stearoyl-CoA DES with its substrate revealed that interaction between the DES and the acyl-carrier was indeed fundamental to orient the acyl-chain in the catalytic tunnel of the enzyme (Wang *et al.*, 2015).

Acyl-CoA- $\Delta 6$ -DES overexpression in *O. tauri* importantly altered FA-profile of TAG and that of structural lipids only moderately. In contrast, acyl-CoA- $\Delta 6$ -DES overexpression in *N. benthamiana* resulted in the accumulation of  $\Delta 6$ -desaturation products in all phospholipids. These results are coherent with the acyl-CoA specificity of Ot13: in *O. tauri* the incorporation of unwanted acyl-CoA  $\Delta 6$ -DES products into TAG possibly circumvents the alteration of extraplastidic lipids whereas in *N. benthamiana* leaves acyl-CoA are likely preferentially incorporated into PC, and in part transferred to MGDG (see below).

#### *$\omega$ -3/ $\omega$ -6 and 16:4-galactolipid species selectivity*

The preference of Ot05 for  $\omega$ -3-substrates was reflected by the important accumulation of 18:4n-3 at the expense of 18:3n-3 observed in Ot05-OE from all of the host organisms. Conversely, Ot10 appeared globally more selective for  $\omega$ -6 substrates. Nevertheless, Ot10 seemed to further display a  $\omega$ -3 specificity for 16:4-galactolipid in which a rise of 18:4n-3 was paralleled by a drop of 18:3n-3. The  $\omega$ -3-desaturation of the overproduced 18:3n-6 in Ot10-OE could possibly be involved in the rise of 18:4n-3. However, one would expect a higher accumulation of 18:3n-6 in Ot10-OE compared to Ot05-OE if only this route was used, which is not the case. Indeed, the endogenous  $\omega$ -3-desaturase appeared to compete efficiently with the  $\Delta 6$ -desaturation of 18:2n-6 to 18:3n-6 maintaining a high amount of 18:3n-3 in p $\Delta 6$ -DES-OE; therefore, the specific 18:4n-3 accumulation in 16:4-galactolipids most likely involves the  $\Delta 6$ -desaturation of 18:3n-3 precursors in the Ot10-OE *O. tauri* line.

In summary our results suggest that in addition to a distinctive preference of Ot05 and Ot10 for  $\omega$ -3 substrates, Ot10 is further able to accept highly unsaturated galactolipids  $\omega$ -3 substrates. Compared to *Synechocystis*, the higher activity of Ot10 on  $\omega$ -6-substrates in *N. benthamiana* and *O. tauri* might also rely on the higher unsaturation degree of the non-substrate acyl-chain in these hosts. Therefore, the overall unsaturation degree of substrate molecular species appears to influence the activity/  $\omega$ -specificity of Ot10 while Ot05 activity seems independent of the unsaturation degree of the associated C16.



## Export of plastidic PUFA

Overexpression of each of the three  $\Delta 6$ -DES in *O. tauri* led to a similar increase of 20:4n-6 in DGTA and TAG and a specific increase of 18:4n-3 in DGTA for Ot05-OE. We previously reported that the acyl-CoA pool was enriched in 18:3n-3 and 18:4n-3, whose amounts were varying according to the plastidic C18-PUFA content (Degraeve-Guilbault *et al.*, 2017). Together with the discovery of p $\Delta 6$ -DES, these previous observations support that  $\Delta 6$ -desaturation products are exported from the plastid to the acyl-CoA pool. Though it cannot be excluded that p $\Delta 6$ -DES have (limited) access to extraplastidic substrates as suggested for the plastidic  $\omega$ -3-DES *C. reinhardtii*, front-end DES specificity is known to be more restricted than those of  $\omega$ -3-DES (Meesapyodsuk & Qiu, 2012; Nguyen *et al.*, 2013; Wang *et al.*, 2013). Unexpectedly, p $\Delta 6$ -DES-OE impacted extraplastidic lipids to a much greater extent in *N. benthamiana*. As mentioned above, these changes are likely arising from reallocation of xenobiotic plastidic  $\Delta 6$ -desaturation products to other membranes, possibly to circumvent deleterious effects, and from the low capacity of leaves to synthesize TAG. In *A. thaliana* mutants deficient for the plastidic  $\omega$ -3-DES (*FAD7*), alteration of 18:3 content in extraplastidic lipids has been reported and implied a two-way exchange of lipids between the chloroplast and the extrachloroplastic compartments (Browse *et al.*, 1986a). Most of the following work focused on the transfer of lipid and PUFA from the ER to the chloroplast, establishing the idea that the reverse transport was negligible (Miquel & Browse, 1992; Li, N *et al.*, 2016). Nevertheless, the recent characterization of two *Arabidopsis* plastid lipases mutants highlighted that plastidic PUFA indeed contributed to PUFA remodelling of extraplastidic lipid (Wang *et al.*, 2017; Higashi *et al.*, 2018).

## Co-regulation of DGDG and DGTA PUFA content

In *O. tauri* 16:4 is exclusively at *sn*-2 position in both extraplastidic and plastidic lipids while being absent from the acyl-CoA pool and mostly at lateral positions in TAG. The SFA/16:4 combinations account for more than 70% and 20% of PDPT and DGTA species, respectively (Degraeve-Guilbault *et al.*, 2017). In Ot05-OE, the concomitant 18:4n-3 increase and 16:4n-3 decrease specifically observed in DGDG and DGTA again rises the question about the origin of 16:4 extraplastidic again; indeed, the decreases of 20:4/16:4 DGTA and 18:3/16:4 DGDG could be related assuming that 16:4-DGDG species would yield DAG precursors for 16:4-extraplastidic species synthesis. Alternatively, the TAG pool could be



involved. For instance, the peculiar TAGs species 16:4/16:4/18:X possibly gives DAG precursors with a 16:4-*sn*-2. Galactosyl-Galactosyl-Galactolipid-transferase, yet not identified in microalgae, supports the production of DAG from DGDG in plants under freezing conditions (Moellering *et al.*, 2010). Export of specific DGDG-species to extraplastidic membranes has been reported for plants and microalgae under phosphate starvation (Jouhet *et al.*, 2004; Khozin-Goldberg & Cohen, 2006).

### Significance of plastidic $\Delta 6$ -DES

The absence of alteration in growth or photosynthetic processes in *O. tauri*  $\Delta 6$ -DES-OE is possibly related to compensatory mechanisms, including the increase of 16:0 and the decrease of 16:4. Photosynthesis defects were not detected in *Synechocystis* mutant devoided of 18:3n-3 and 18:4n-4, and could be unveiled only in very specific conditions in the *Arabidopsis* mutant lacking trienoic PUFA (Gombos *et al.*, 1992; Vijayan & Browse, 2002). There is overall only little evidence that plastidic PUFA support photosynthetic processes (Mironov *et al.*, 2012; Kugler *et al.*, 2019).

The only plastidial front-end desaturase so far described was a  $\Delta 4$ -DES from *C. reinhardtii* and its Cyt-b5 domain was shown to be active *in vitro* (Zauner *et al.*, 2012). Our data further show that a functional Cyt-b5 is absolutely required for *O. tauri* p $\Delta 6$ -DES activity in both *N. benthamiana* and *Synechocystis*. These results illustrate the very tight co-evolution of Cyt-b5 and desaturase domains (Napier *et al.*, 2003). It further indicates that a redox partner different from the eukaryotic Cyt-b5 oxidoreductase is involved (Napier *et al.*, 2003; Kumar *et al.*, 2012; Meesapyodsuk & Qiu, 2012). One possible candidate is the Ferredoxin NADP<sup>+</sup>-reductase (Yang *et al.*, 2015).

The requirement of three  $\Delta 6$ -DES in an photosynthetic organism displaying the most reduced set of genes, points to the necessity of regulating the chloroplast and the cytosolic C18-PUFA pools distinctively. The existence of putative homologs of p $\Delta 6$ -DES in other microalgae species, such as haptophytes and dinoflagellates, might also be related to the co-occurrence of 18:5 in galactolipids and the prevalence of VLC-PUFA in extraplastidic lipids. For the diatom *P. tricornutum*, the putative p $\Delta 6$ -DES homolog might be involved in the desaturation of plastidic C16-PUFA as it had been suspected long ago (Domergue *et al.*, 2002). For most *Mamiellophyceae*, with the exception of *Bathycoccus prasinos*, the two p $\Delta 6$ -

DES most likely arise from gene duplication. Ot10 would have evolved to restrict its specificity to a particular set of substrates. Transcriptional regulation of Ot05 by phosphate deprivation indicates that it is a physiological target under these conditions. The selectivity of Ot05 for SQDG, which is considered as a surrogate of PG under phosphate limitation, supports the importance of Ot05 in these conditions. Ot10 and the putative  $\omega$ -3-DES transcriptional regulation might be targeted by other environmental cues, which still need to be discovered.

## METHODS

All chemicals were purchased from Sigma Chemical (St. Louis, MO, USA), when not stated otherwise.

### Biological material & cultures

*O. tauri* (clonal isolate from OtH95) was grown as previously described in artificial seawater with either 5  $\mu$ M or 35  $\mu$ M NaH<sub>2</sub>PO<sub>4</sub>; penicillin (0,5 mg/ml) and streptomycin (0.25 mg/ml) together with centrifugation cycles (1000g, 5min) were used to reduce bacterial contamination; flow cytometry was used to assess growth and bacterial contamination (Degraeve-Guilbault *et al.*, 2017). *Synechocystis* PCC 6803 was grown accordingly to (Kotajima *et al.*, 2014). *N. benthamiana* plants were cultivated in a greenhouse under controlled conditions (16h:8h photoperiod, 25°C). *Agrobacterium tumefaciens* strain GV3101 was grown in Luria Broth medium at 30°C; *Saccharomyces cerevisiae* strain InvSc1 (*MATa adc2-1 his3-11,15 leu2-3,112 trp1-1 ura3-52*; Invitrogen) was grown in synthetic dextrose medium (5 mL, 50-mL Erlenmeyer flask, 30 °C, 180 rpm).

### Cloning strategy

PCR amplifications of DES ORF were achieved using Q5® Polymerase by two-step PCR on cDNA matrix (primers Table S4). Monarch DNA Gel Extraction kit was used when necessary (New England Biolabs, Ipswich, MA, US). Overexpression vectors were the pOtoLuc for *O. tauri* (Moulager *et al.*, 2010), pTHT2031S vector for *Synechocystis* PCC 6803 (Kotajima *et al.*, 2014), the GATEWAY destination vectors pVT102-U-GW for *S. cerevisiae* (Domergue *et al.*, 2010) and PK7W2G2D for *N. benthamiana* (Karimi *et al.*, 2002). For subcellular localization, the final destination vector was pK7YWG2 (Karimi *et al.*, 2002)

N-terminal-YFP-fusion was used. Subcloning was achieved in pGEMT vector by restriction enzymes (Promega, Madison, WI, US), in pUC57 for codon-optimized sequence used in *Synechocystis* and for *S. cerevisiae* (GenScript Biotech, Netherlands) and/or in pDONR 221 for GATEWAY cloning. Restriction cloning was used for cloning in pOtLux, and ligation was used to introduce the synthetic gene in pTHT2031S In-Fusion® HD cloning kit (Takara Bio, Kusatsu, Japan). Sequencing was achieved by Genwiz (Genwiz, Leipzig, Germany).

Site-directed mutagenesis H >A of the HPGG motif of the Cyt-b5 domain was either performed by Genescript (*N. benthamiana*) or using In-Fusion® HD cloning kit (Takara Bio, Kusatsu, Japan) for *Synechocystis* after amplification using two mutagenic complementary primers for amplifying pTHT2031-*Ot5H46A-S* and pTHT2031-*Ot10H20A-S* from pTHT2031-*Ot5-S* and pTHT2031-*Ot10-S*, respectively. The mutated DNA sequence was validated for the correct modification using BigDye® Terminator v.3.1 (Life Technologies, Carlsbad, CA, US).

#### RNA and cDNA preparation and quantitative RT-PCR analysis

RNeasy-Plus Mini kit (Qiagen, Hilden, Germany) was used for RNA purification; DNase I was used to remove contaminating DNA (DNA-free kit, Invitrogen, Carlsbad, USA) and cDNA obtained using the reverse transcription iScript™ supermix kit (Bio-Rad, Hercules, CA, USA). Real-time RT quantitative PCR reactions were performed in a CFX96™ Real-Time System (Bio-Rad) using the GoTaq® qPCR Master mix (Promega, Madison, WI, USA) (Primers Table S4). Bio-Rad CFX Manager software was used for data acquisition and analysis (version 3.1, Bio-Rad). Ct method was used to normalized transcript abundance with the references mRNA *EF1α* (elongation factor), *CAL* (calmodulin), and *ACTprot2* (Actin protein-related 2). PCR efficiency ranged from 95 to 105%. Technical triplicate was used, and at least two independent experiments were achieved.

#### Genetic transformation

*O. tauri* electroporation was adapted from (Corellou *et al.*, 2009). Transgenics were obtained by electroporation and pre-screened accordingly to their luminescent level (Moulager *et al.*, 2010). *S. cerevisiae* was transformed using a PEG/lithium acetate protocol, and FA supplementation was achieved as previously described (Dohmen *et al.*, 1991). Control

lines are transgenics of empty vectors. *N. benthamiana* leaves from five-week old plants were infiltrated with *Agrobacterium tumefaciens* previously transformed by electroporation; the p19 protein to minimize plant post-transcriptional gene silencing (PTGS) was used in all experiments (Voinnet *et al.*, 2003). Briefly, *A. tumefaciens* transformants were selected with antibiotics (gentamycin 25µg/mL with spectinomycin 100µg/mL or kanamycin 50µg/mL). *Agrobacterium* transformants were grown overnight, diluted to a OD600 to 0.1 and grown to a OD600 of 0.6-0.8. Cells were re-suspended in 5 mL sterilized H<sub>2</sub>O for a final OD of 0.4 and 0.2 for overexpression and subcellular localization experiments, respectively and 1 mL was agroinfiltrated. Plants were analyzed 2 and 5 days after *Agrobacterium* infiltration for subcellular localization experiments and for overexpression, respectively.

*Synechocystis* transformation was achieved by homologous recombination (Williams, 1988). Briefly, the plasmid was transformed into ten-time concentrated cells of the  $\Delta desD$  strain collected at mid-log phase. Subsequently, the cell was incubated at 30 °C under white fluorescent lamps for 16-18 hr and selected by 25 µg/mL chloramphenicol and 5 µg/mL spectinomycin on BG-11 solid media (1.5% w/v Bacto-agar).

#### Lipid analysis

For all organisms, FA analyses and for *O. tauri* further lipid analysis were achieved accordingly to (Degraeve-Guilbault *et al.*, 2017). Organic solvents all contained butylhydroxytoluene as an antioxidant (0.001%). For *N. benthamiana* frozen material (one leaf broken into pieces) was preincubated in hot isopropanol (3ml, 75°C, 15 min, for PLD inhibition), further extracted with CHCl<sub>3</sub> (1mL, Ultra-turax T25); Phase separation occurred upon addition of NaCl 2.5% (2000g, 10 min). Pellet was re-extracted (3 mL CHCl<sub>3</sub>: CH<sub>3</sub>OH 2:1 v/v); Organic phases were washed twice with 0.25v of CH<sub>3</sub>OH:H<sub>2</sub>O (10:9 v/v). The lipid extract was evaporated under a nitrogen stream and resuspended in CHCl<sub>3</sub>:CH<sub>3</sub>OH 2:1, v/v (200 µL). Lipids were separated by HP-TLC and chloroform/methanol/ glacial acetic acid/water (85:12:12:1 v/v/v/v). For *Synechocystis* (30mg DW, 3 mL CHCl<sub>3</sub>:CH<sub>3</sub>OH 2:1 v/v) extraction was achieved using glass bead vortexing. HP-TLC developments were achieved in the ADC2- chamber system (CAMAG) accordingly to (Degraeve-Guilbault *et al.*, 2017) except for *Synechocystis* polar lipids (CHCl<sub>3</sub>:CH<sub>3</sub>OH/CH<sub>3</sub>COOH/H<sub>2</sub>O 85:12:12:1 v/v/v/v) (Sallal *et al.*, 1990). Lipids were visualized and collected as previously described.

MS analyses of *O. tauri* glycerolipid species lipids was performed accordingly to the method describe previously (Abida *et al.*, 2015). Purified lipids were introduced by direct infusion (electrospray ionization-MS) into a trap-type mass spectrometer (LTQ-XL; Thermo Scientific) and identified by comparison with standards. Lipids were identified by MS<sup>2</sup> analysis with their precursor ion or by neutral loss analyses. Positional analysis of FA in glycerolipids was achieved as previously described (Degraeve-Guilbault *et al.*, 2017).

## Confocal microscopy

Live cell imaging was performed using a Leica SP5 confocal laser scanning microscopy system (Leica, Wetzlar, Germany) equipped with Argon, DPSS, He-Ne lasers, hybrid detectors, and 63x oil-immersion objective. *N. benthamiana* leave samples were transferred between a glass slide and coverslip in a drop of water. Fluorescence was collected using excitation /emission wavelengths of 488/490-540 nm for chlorophyll, 488/575- 610 nm for YFP, and 561/710- 740 nm for m-cherry. Colocalization images were taken using sequential scanning between frames. Experiments were performed using strictly identical confocal acquisition parameters (*e.g.* laser power, gain, zoom factor, resolution, and emission wavelengths reception), with detector settings optimized for low background and no pixel saturation.

## Photosynthesis measurement.

Measurements were made using a PhytoPAM (Heinz Walz GmbH, Germany).

## *Light-response of photosystem II activity*

Rapid light-response curves (RLCs) of chlorophyll fluorescence of the cultures were achieved accordingly (Serodio *et al.*, 2006). Briefly, the cultures were exposed to 12 increasing actinic light levels (10-s light steps of 100  $\mu$ E increase from 64 to 2064  $\mu$ E), and the electron transport rates (ETR) were calculated on each step to draw RLCs. The following parameters were extracted from the ETR-irradiance curve fitted to the experimental data: the initial slope of the curve ( $\alpha$ ), the light-saturation parameters ( $I_k$ ), and the maximum relative electron transport rate (ETR<sub>max</sub>).

## Photoinhibition experiment

Optimal conditions for photosystem II inhibition and recovery were adapted from (Campbell & Tyystjarvi, 2012). Cultures (50 mL, triplicate) were maintained under fluorescent white light (low light:  $30.4 \pm 1.0 \mu\text{E}$ , white light) without agitation at  $20.2 \pm 0.2^\circ\text{C}$  and moved to high light ( $117.6 \pm 4.9 \mu\text{E}$ , blue LED) for 45 min (photoinhibition); photorecovery under initial condition was monitored for over 2 h. One mL sampling was used to assess photosynthetic efficiency (quantum yield of photochemical energy conversion in PSII;  $Y$  corresponds to  $\text{Yield} = dF/F_m$ ).

## Sequences analyses

DES domain-containing sequences were retrieved from genomic and transcriptomic data from NCBI (Bioproject Accession: PRJNA304086 ID: 304086). Annotated ORF were manually checked for the completion of Nt sequences in species from the class Mamiellalophyceae; cTP were predicted from PredAlgo (Tardif et al., 2012); alignment of Mamiellalophyceae homologous sequences was used to further determine putative cTP assumed to correspond to the non-conserved Nt region (Snapgene trial version, Clustal omega). These non-conserved regions were discarded for expression in *S. cerevisiae* and *Synechocystis*. Codon-optimized sequences were obtained from Genewiz (Europe).

## Accession numbers

[At]S8: *Arabidopsis thaliana* AEE80226.1, [Bo]6: *Borago officinalis* AKO69639.1, [Ce] *Caenorabditis elegans* CAA94233.2, [Cr]4p *Chlamydomonas reinhardtii* AFJ74144.1, [Ep]6 *Echium plantagineum* AAZ08559.1, [Eg]8 *Euglena gracilis* AA D45877.1, [Eh] *Emiliana huxleyi* putative protein XP\_005793257.1, [Gt] *Guillardia theta* CCMP2712 putative protein XP\_005823787.1, [Ig]5/6 *Isochrysis galbana* ALE15224.1 and AHJ25674.1, [Lb] *Leishmania braziliensis* putative protein XP\_001569342.1, [Li]6 *Lobosphaera incisa* ADB81955.1, [Ma]6 *Mortierella alpine* BAA85588.1, [Mp]6CoA *Micromonas pusilla* XP\_003056992.1, [Ms]6CoA *Mantoniella squamata* CAQ30479.1, [No]6 *Nannochloropsis oculata*, ADM86708.1, [Ot] *Ostreococcus tauri* CAL56435.1 ( $\Delta 6$  acyl-CoA- DES Ot13.1), CEF97803.1 (Ot05), CEF99426.1 (Ot10); CEG01739.1 (Ot15); CEF99964.1, (D5-DES), CEF96519.1 (4ER), CEG00114.1, (D4p, Ot13.2), [Pt] *Phaeodactylum tricornutum*



XP\_002185374.1 (putative protein), EEC45637.1 (D6-DES) EEC45594.1 (D5-DES), [Vc] *Volvox carteri* XP\_002953943.1, [SS] *Synechocystis* sp BAA18502.1, [Tp] *Thalassiosira pseudonana*, XP\_002289468.1 (putative protein) AAX14504.1 (S8); AAX14502.1 (8); AAX14505.1 (6), XP\_002297444.1 (4).

## Acknowledgements

This work was supported by the Région-Aquitaine grant “omega-3” and the University of Bordeaux grant Synthetic biology SB2 “Pico-FADO”. Routine lipids analyses were performed at the Metabolome Facility of Bordeaux-MetaboHUB (ANR-11-INBS-0010). Imaging was performed at the Bordeaux Imaging Center, member of the national infrastructure France BioImaging.

## FIGURES LEGENDS

**Figure 1. *O. tauri* front-end DES sequence features.** **A.** Phylogenetic tree of *O. tauri* front-end DES and closest related homologs (Fast minimum evolution method). Species are indicated in brackets, numbering refers to putative (*Italics*) or assessed DES D-regiospecificity. S, sphingolipid-DES; p, plastidial DES; er, microsomal DES; 6CoA, acyl-CoA  $\Delta$ 6-DES. The three  $\Delta$ 6/8-DES candidates are in bold and their label used in this paper in brackets. Colors of nodes refer to the taxonomic groups: cyanobacteria (purple), eukaryotes (gray), green algae (deep blue), eudicots (beige), cryptomonads (light blue), haptophytes (light green), cryptomonads (yellow), euglenoids (pale pink) kinetoplastids (bright pink), fungi (deep green) nematods (red). [At] *Arabidopsis thaliana*, [Bo] *Borago officinalis*, [Ce] *Caenorabditis elegans*, [Cr] *Chlamydomonas reinhardtii*, [Ep]- *Echium plantagineum*, [Eg] *Euglena gracilis*, [Eh] *Emiliana huxleyi*, [Gt] *Guillardia theta* CCMP2712, [Ig] *Isochrisis galbana*, [Lb] *Leishmania braziliensis*, [Li] *Lobosphaera incisa*, [Ma] *Mortierella alpine*, [Mp] *Micromonas pusilla*, [Ms] *Mantoniella squamata*, [No] *Nannochloropsis oculata*, [Ot] *Ostreococcus tauri*, [Pt] *Phaeodactylum tricornutum*, [Vc] *Volvox carteri*, [SS] *Synechocystis* sp PCC6803, [Tp] *Thalassiosira pseudonana*. **B.** Alignment of the acyl-CoA- $\Delta$ 6-DES and the three  $\Delta$ 6/8-DES candidates in the histidine-box regions. Histidine-box motifs are in blue frames. Color highlighting is based on physical properties and conservation (clustal Omega): positive (red), negative (purple), polar (green), hydrophobic (blue), aromatic (turquoise), glutamine (orange), proline (yellow). Grey blocks highlight conservation only.



**Figure 2. Localization and activities of *O. tauri* acyl-CoA  $\Delta 6$ -DES and  $\Delta 6$ -DES candidates in *N. benthamiana*.** **A.** Sub-cellular localisation of transiently overexpressed full-length Ct-YFP-fused proteins. Images merged from Ot13-YFP and ER marker fluorescence and from Ot05-YFP or Ot10-YFP and chlorophyll fluorescence. Experiments were repeated at least twice. Images represent 100% of the observed cells (n). n=16 for Ot13-YFP, n=25 for Ot05-YFP, n=21 for Ot10-YFP. Experiments were repeated at least twice. Images represent 100% of the observed cells (n). n=16 for Ot13-YFP (Acyl-CoA-D6-DES), n=25 for Ot05-YFP, n=21 for Ot10-YFP. Bar, 10 $\mu$ m. **B.** FA-profiles of DES overexpressors. Means and standard deviations of n independent experiments are plotted as histogram and the relative production of  $\omega$ -3 C18-PUFA (18:4n-3/18:3n-3) and  $\omega$ -6 C18-PUFA (18:3n-6/18:2n-6) in each experiment are shown in dot clouds. Dots corresponding to leaves used for the lipids analysis showed in C are indicated by blue arrows. Control lines (p19) n=27, Ot13-OE n=17, Ot10-OE n=21, Ot05-OE n=29. **C.** Relative production of  $\omega$ -3 and  $\omega$ -6 C18-PUFA in glycerolipids. Cumulative ratio of pmol percent are plotted 18:4n-3/18:3n-3 yellow bars, 18:3n-6/18:2n-6 red bars. On representative experiment out of two is shown (Fig. S7).

**Figure 3. Glycerolipid analysis of  $\Delta$ desD *Synechocystis* PCC6803 Ot5-OE and Ot10-OE.** Upper drawing indicates the respective role of desD and desB for the regulation of C18-PUFA in *Synechocystis* PCC6803. C18-PUFA present at 34°C are highlighted in red, those present at 24°C in blue. FA profile of glycerolipids at 34°C (**A, B, C, D**) and 24°C (**E, F, G, H**). Means and standard deviations of three independent experiments are shown. MGDG and DGDG displayed similar alterations and were cumulated (GL for galactolipids).

**Figure 4. Glycerolipid features of *O. tauri*  $\Delta 6$ -DES-overexpressors.** **A.** Luminescence of transgenic lines (Relative Luminescence Units from 200 $\mu$ l). Mean of triplicate and standard deviations are shown. **B.** Cellular amount of  $\omega$ -3-C18-PUFA **C.** Cellular amount of  $\omega$ -6-C18-PUFA. The labels v, 5, 10 and 13 correspond to lines transformed with empty vector, Ot5, Ot10 and Ot13 respectively. **D.** Total glycerolipid FA profiles of lines selected for detailed lipid analysis (Ot05-5, Ot10-5, Ot13-5). **B to D.** Means of triplicate independent experiments and standard deviation are shown.

**Figure 5. Detailed Lipid analysis of *O. tauri*  $\Delta 6$ -DES overexpressors.** **A to F.** Major plastidic glycerolipids. **G, H.** Extrplastidic glycerolipids. For FA-profile analyses,

(A,C,E,F,G,H) means and standard deviations of three independent experiments are shown; control line contains the empty vector. **B, D, F.** C18-PUFA molecular species analysis of major plastidic lipids. Means and standard deviations of technical triplicate are shown. Samples used for this analysis are independent from those used for GC-FID analysis; control line is the wild-type (WT).

**Figure 6. Phosphate limitation and  $\Delta 6$ -DES regulation in *O. tauri*.** **A-B.** Impact of phosphate deprivation on C18-PUFA proportion (A) and desaturases transcript levels (B). **C.** Photosynthetic inhibition responses of *O. tauri*  $\Delta 6$ -DES-OE in phosphate- limited conditions. Photosynthesis efficiency (Yield) was assessed under 30  $\mu\text{mol}/\text{m}^2/\text{s}$  (low light LL; Fig. S14) before light intensity was increased for 45 min to 120  $\mu\text{mol}/\text{m}^2/\text{s}$  (high light HL: photoinhibition) and put back to 30  $\mu\text{mol}/\text{m}^2/\text{s}$  (LL: recovery). Values are expressed as the percentage of each culture's yield before photoinhibition ( $T_0$ ). Means ( $\pm$  standard deviations) of triplicates from independent cultures are shown. Cell density for control (i.e. empty vector transgenic), Ot13-OE, Ot10-OE, Ot05-OE was in average, 48, 44, 32 and  $48.10^6$  cell/ml respectively.

## REFERENCE

- Abida H, Dolch LJ, Mei C, Villanova V, Conte M, Block MA, Finazzi G, Bastien O, Tirichine L, Bowler C, et al. 2015.** Membrane glycerolipid remodeling triggered by nitrogen and phosphorus starvation in *Phaeodactylum tricornutum*. *Plant Physiol* **167**(1): 118-136.
- Ahmann K, Heilmann M, Feussner I. 2011.** Identification of a Delta4-desaturase from the microalga *Ostreococcus lucimarinus*. *European Journal of Lipid Science and Technology* **113**: 832-840.
- Allakhverdiev SI, Los DA, Murata N 2009.** Regulatory Roles in Photosynthesis of Unsaturated Fatty Acids in Membrane Lipids. In: Wada H, Murata N eds. *Lipids in Photosynthesis: Essential and Regulatory Functions*. Dordrecht: Springer Netherlands, 373-388.
- Browse J, McCourt P, Somerville C. 1986a.** A mutant of *Arabidopsis* deficient in c(18:3) and c(16:3) leaf lipids. *Plant Physiol* **81**(3): 859-864.
- Browse J, Warwick N, Somerville CR, Slack CR. 1986b.** Fluxes through the prokaryotic and eukaryotic pathways of lipid synthesis in the '16:3' plant *Arabidopsis thaliana*. *Biochem J* **235**(1): 25-31.
- Campbell DA, Tyystjarvi E. 2012.** Parameterization of photosystem II photoinactivation and repair. *Biochim Biophys Acta* **1817**(1): 258-265.

- 651 **Chr tiennot-Dinet M-J, Courties C, Vaquer A, Neveux J, Claustre H, Lautier J, Machado MC. 1995.** A  
652 new marine picoeucaryote: *Ostreococcus tauri* gen. et sp. nov. (Chlorophyta,  
653 Prasinophyceae). *Phycologia* **34**(4): 285-292.
- 654 **Corellou F, Schwartz C, Motta JP, Djouani-Tahri el B, Sanchez F, Bouget FY. 2009.** Clocks in the green  
655 lineage: comparative functional analysis of the circadian architecture of the picoeukaryote  
656 *ostreococcus*. *Plant Cell* **21**(11): 3436-3449.
- 657 **Courties C, Vaquer A, RTrousselier M, Lautier J, Chr tiennot-Dinet M-J, Neveux J, Machado C. 1994.**  
658 Smallest eukaryotic organism. *Nature* **370**: 255.
- 659 **Degraeve-Guilbault C, Br h lin C, Haslam R, Sayanova O, Marie-Luce G, Jouhet J, Corellou F. 2017.**  
660 Glycerolipid Characterization and Nutrient Deprivation-Associated Changes in the Green  
661 Picoalga *Ostreococcus tauri*. *Plant Physiology* **173**(4): 2060-2080.
- 662 **Derelle E, Ferraz C, Rombauts S, Rouze P, Worden AZ, Robbens S, Partensky F, Degroeve S,**  
663 **Echeynie S, Cooke R, et al. 2006.** Genome analysis of the smallest free-living eukaryote  
664 *Ostreococcus tauri* unveils many unique features. *Proc Natl Acad Sci U S A* **103**(31): 11647-  
665 11652.
- 666 **Domergue F, Abbadi A, Ott C, Zank TK, Zahringer U, Heinz E. 2003.** Acyl carriers used as substrates  
667 by the desaturases and elongases involved in very long-chain polyunsaturated fatty acids  
668 biosynthesis reconstituted in yeast. *J Biol Chem* **278**(37): 35115-35126.
- 669 **Domergue F, Abbadi A, Zahringer U, Moreau H, Heinz E. 2005.** In vivo characterization of the first  
670 acyl-CoA Delta6-desaturase from a member of the plant kingdom, the microalga  
671 *Ostreococcus tauri*. *Biochem J* **389**(Pt 2): 483-490.
- 672 **Domergue F, Lerchl J, Zahringer U, Heinz E. 2002.** Cloning and functional characterization of  
673 *Phaeodactylum tricornutum* front-end desaturases involved in eicosapentaenoic acid  
674 biosynthesis. *Eur J Biochem* **269**(16): 4105-4113.
- 675 **Domergue F, Vishwanath SJ, Joub s J, Ono J, Lee JA, Bourdon M, Alhattab R, Lowe C, Pascal S,**  
676 **Lessire R, et al. 2010.** Three Arabidopsis fatty acyl-coenzyme A reductases, FAR1, FAR4, and  
677 FAR5, generate primary fatty alcohols associated with suberin deposition. *Plant Physiology*  
678 **153**(4): 1539-1554.
- 679 **Gombos Z, Wada H, Murata N. 1992.** Unsaturation of fatty acids in membrane lipids enhances  
680 tolerance of the cyanobacterium *Synechocystis* PCC6803 to low-temperature  
681 photoinhibition. *Proc Natl Acad Sci U S A* **89**(20): 9959-9963.
- 682 **Grimsley N, Pequin B, Bachy C, Moreau H, Piganeau G. 2010.** Cryptic sex in the smallest eukaryotic  
683 marine green alga. *Mol Biol Evol* **27**(1): 47-54.
- 684 **Hamilton ML, Powers S, Napier JA, Sayanova O. 2016.** Heterotrophic Production of Omega-3 Long-  
685 Chain Polyunsaturated Fatty Acids by Trophically Converted Marine Diatom *Phaeodactylum*  
686 *tricornutum*. *Mar Drugs* **14**(3).
- 687 **Heilmann I, Mekhedov S, King B, Browse J, Shanklin J. 2004a.** Identification of the Arabidopsis  
688 palmitoyl-monogalactosyldiacylglycerol delta7-desaturase gene FAD5, and effects of

689 plastidial retargeting of Arabidopsis desaturases on the fad5 mutant phenotype. *Plant Physiol*  
690 **136**(4): 4237-4245.

691 **Heilmann I, Pidkowich MS, Girke T, Shanklin J. 2004b.** Switching desaturase enzyme specificity by  
692 alternate subcellular targeting. *Proc Natl Acad Sci U S A* **101**(28): 10266-10271.

693 **Higashi Y, Okazaki Y, Takano K, Myouga F, Shinozaki K, Knoch E, Fukushima A, Saito K. 2018.**  
694 *HEAT INDUCIBLE LIPASE1* Remodels Chloroplastic Monogalactosyldiacylglycerol  
695 by Liberating  $\alpha$ -Linolenic Acid in Arabidopsis Leaves under Heat Stress. *The Plant Cell* **30**(8):  
696 1887-1905.

697 **Hoffmann M, Wagner M, Abbadi A, Fulda M, Feussner I. 2008.** Metabolic engineering of omega3-  
698 very long chain polyunsaturated fatty acid production by an exclusively acyl-CoA-dependent  
699 pathway. *J Biol Chem* **283**(33): 22352-22362.

700 **Jonasdottir SH. 2019.** Fatty Acid Profiles and Production in Marine Phytoplankton. *Mar Drugs* **17**(3).

701 **Jouhet J, Marechal E, Baldan B, Bligny R, Joyard J, Block MA. 2004.** Phosphate deprivation induces  
702 transfer of DGDG galactolipid from chloroplast to mitochondria. *J Cell Biol* **167**(5): 863-874.

703 **Karimi M, Inze D, Depicker A. 2002.** GATEWAY vectors for Agrobacterium-mediated plant  
704 transformation. *Trends Plant Sci* **7**(5): 193-195.

705 **Khozin-Goldberg I, Cohen Z. 2006.** The effect of phosphate starvation on the lipid and fatty acid  
706 composition of the fresh water eustigmatophyte *Monodus subterraneus*. *Phytochemistry*  
707 **67**(7): 696-701.

708 **Khozin-Goldberg I, Leu S, Boussiba S. 2016.** Microalgae as a Source for VLC-PUFA Production. *Subcell*  
709 *Biochem* **86**: 471-510.

710 **Kim Y, Terng EL, Riekhof WR, Cahoon EB, Cerutti H. 2018.** Endoplasmic reticulum acyltransferase  
711 with prokaryotic substrate preference contributes to triacylglycerol assembly in  
712 *Chlamydomonas*. *Proceedings of the National Academy of Sciences*.

713 **Kotajima T, Shiraiwa Y, Suzuki I. 2014.** Functional screening of a novel Delta15 fatty acid desaturase  
714 from the coccolithophorid *Emiliania huxleyi*. *Biochim Biophys Acta* **1842**(10): 1451-1458.

715 **Kugler A, Zorin B, Didi-Cohen S, Sibiryak M, Gorelova O, Ismagulova T, Kokabi K, Kumari P,**  
716 **Lukyanov A, Boussiba S, et al. 2019.** Long-Chain Polyunsaturated Fatty Acids in the Green  
717 Microalga *Lobosphaera incisa* Contribute to Tolerance to Abiotic Stresses. *Plant Cell Physiol*  
718 **60**(6): 1205-1223.

719 **Kumar R, Tran LS, Neelakandan AK, Nguyen HT. 2012.** Higher plant cytochrome b5 polypeptides  
720 modulate fatty acid desaturation. *PLoS ONE* **7**(2): e31370.

721 **Lang I, Hodac L, Friedl T, Feussner I. 2011.** Fatty acid profiles and their distribution patterns in  
722 microalgae: a comprehensive analysis of more than 2000 strains from the SAG culture  
723 collection. *BMC Plant Biol* **11**: 124.

724 **Leblond JD, McDaniel SL, Lowrie SD, Khadka M, Dahmen J. 2019.** Mono- and  
725 digalactosyldiacylglycerol composition of dinoflagellates. VIII. Temperature effects and a  
726 perspective on the curious case of *Karenia mikimotoi* as a producer of the unusual, 'green  
727 algal' fatty acid hexadecatetraenoic acid [16:4(n-3)]. *European Journal of Phycology* **54**(1):  
728 78-90.

729 **Lee JM, Lee H, Kang S, Park WJ. 2016.** Fatty Acid Desaturases, Polyunsaturated Fatty Acid Regulation,  
730 and Biotechnological Advances. *Nutrients* **8**(1).

731 **Leliaert F, Smith DR, Moreau H, Herron MD, Verbruggen H, Delwiche CF, De Clerck O. 2012.**  
732 Phylogeny and Molecular Evolution of the Green Algae. *Critical Reviews in Plant Sciences*  
733 **31**(1): 1-46.

734 **Li-Beisson Y, Beisson F, Riekhof W. 2015.** Metabolism of acyl-lipids in *Chlamydomonas reinhardtii*.  
735 *Plant J* **82**(3): 504-522.

736 **Li D, Moorman R, Vanhercke T, Petrie J, Singh S, Jackson CJ. 2016.** Classification and substrate head-  
737 group specificity of membrane fatty acid desaturases. *Comput Struct Biotechnol J* **14**: 341-  
738 349.

739 **Li N, Xu C, Li-Beisson Y, Philippar K. 2016.** Fatty Acid and Lipid Transport in Plant Cells. *Trends Plant*  
740 *Sci* **21**(2): 145-158.

741 **Li X, Moellering ER, Liu B, Johnny C, Fedewa M, Sears BB, Kuo MH, Benning C. 2012.** A  
742 galactoglycerolipid lipase is required for triacylglycerol accumulation and survival following  
743 nitrogen deprivation in *Chlamydomonas reinhardtii*. *Plant Cell* **24**(11): 4670-4686.

744 **López Alonso D, García-Maroto F, Rodríguez-Ruiz J, Garrido JA, Vilches MA. 2003.** Evolution of the  
745 membrane-bound fatty acid desaturases. *Biochemical Systematics and Ecology* **31**(10): 1111-  
746 1124.

747 **Los DA, Mironov KS, Allakhverdiev SI. 2013.** Regulatory role of membrane fluidity in gene expression  
748 and physiological functions. *Photosynthesis Research* **116**(2): 489-509.

749 **Meesapyodsuk D, Qiu X. 2012.** The front-end desaturase: structure, function, evolution and  
750 biotechnological use. *Lipids* **47**(3): 227-237.

751 **Miquel M, Browse J. 1992.** Arabidopsis mutants deficient in polyunsaturated fatty acid synthesis.  
752 Biochemical and genetic characterization of a plant oleoyl-phosphatidylcholine desaturase. *J*  
753 *Biol Chem* **267**(3): 1502-1509.

754 **Mironov KS, Sidorov RA, Trofimova MS, Bedbenov VS, Tsydendambaev VD, Allakhverdiev SI, Los**  
755 **DA. 2012.** Light-dependent cold-induced fatty acid unsaturation, changes in membrane  
756 fluidity, and alterations in gene expression in *Synechocystis*. *Biochim Biophys Acta* **1817**(8):  
757 1352-1359.

758 **Moellering ER, Muthan B, Benning C. 2010.** Freezing tolerance in plants requires lipid remodeling at  
759 the outer chloroplast membrane. *Science* **330**(6001): 226-228.

- 760 **Moulager M, Corellou F, Vergé V, Escande ML, Bouget FY. 2010.** Integration of Light Signals by the  
761 Retinoblastoma Pathway in the Control of S phase Entry in the Picophytoplanktonic Cell  
762 *Ostreococcus PLoS Genet.*
- 763 **Napier JA, Michaelson LV, Sayanova O. 2003.** The role of cytochrome b5 fusion desaturases in the  
764 synthesis of polyunsaturated fatty acids. *Prostaglandins Leukot Essent Fatty Acids* **68**(2): 135-  
765 143.
- 766 **Nguyen HM, Cuine S, Beyly-Adriano A, Legeret B, Billon E, Auroy P, Beisson F, Peltier G, Li-Beisson**  
767 **Y. 2013.** The green microalga *Chlamydomonas reinhardtii* has a single omega-3 fatty acid  
768 desaturase that localizes to the chloroplast and impacts both plastidic and extraplastidic  
769 membrane lipids. *Plant Physiol* **163**(2): 914-928.
- 770 **Ohlrogge J, Browse J. 1995.** Lipid biosynthesis. *Plant Cell* **7**(7): 957-970.
- 771 **Peltomaa E, Hallfors H, Taipale SJ. 2019.** Comparison of Diatoms and Dinoflagellates from Different  
772 Habitats as Sources of PUFAs. *Mar Drugs* **17**(4).
- 773 **Roman A, Hernandez ML, Soria-Garcia A, Lopez-Gomollon S, Lagunas B, Picorel R, Martinez-Rivas**  
774 **JM, Alfonso M. 2015.** Non-redundant Contribution of the Plastidial FAD8 omega-3  
775 Desaturase to Glycerolipid Unsaturation at Different Temperatures in Arabidopsis. *Mol Plant*  
776 **8**(11): 1599-1611.
- 777 **Ruiz-López N, Sayanova O, Napier JA, Haslam RP. 2012.** Metabolic engineering of the omega-3 long  
778 chain polyunsaturated fatty acid biosynthetic pathway into transgenic plants. *Journal of*  
779 *Experimental Botany* **63**(7): 2397-2410.
- 780 **Sallal AK, Nimer NA, Radwan SS. 1990.** Lipid and fatty acid composition of freshwater cyanobacteria.  
781 *Microbiology* **136**(10): 2043-2048.
- 782 **Sayanova O, Shewry PR, Napier JA. 1999.** Histidine-41 of the cytochrome b5 domain of the borage  
783 delta6 fatty acid desaturase is essential for enzyme activity. *Plant Physiol* **121**(2): 641-646.
- 784 **Sayanova O, Smith MA, Lapinskas P, Stobart AK, Dobson G, Christie WW, Shewry PR, Napier JA.**  
785 **1997.** Expression of a borage desaturase cDNA containing an N-terminal cytochrome b5  
786 domain results in the accumulation of high levels of delta6-desaturated fatty acids in  
787 transgenic tobacco. *Proceedings of the National Academy of Sciences of the United States of*  
788 *America* **94**(8): 4211-4216.
- 789 **Serodio J, Vieira S, Cruz S, Coelho H. 2006.** Rapid light-response curves of chlorophyll fluorescence in  
790 microalgae: relationship to steady-state light curves and non-photochemical quenching in  
791 benthic diatom-dominated assemblages. *Photosynth Res* **90**(1): 29-43.
- 792 **Shi H, Chen H, Gu Z, Song Y, Zhang H, Chen W, Chen YQ. 2015.** Molecular mechanism of substrate  
793 specificity for delta 6 desaturase from *Mortierella alpina* and *Micromonas pusilla*. *J Lipid Res*  
794 **56**(12): 2309-2321.
- 795 **Song L-Y, Zhang Y, Li S-F, Hu J, Yin W-B, Chen Y-H, Hao S-T, Wang B-L, Wang RRC, Hu Z-M. 2014.**  
796 Identification of the substrate recognition region in the  $\Delta^6$ -fatty acid and  $\Delta^8$ -sphingolipid  
797 desaturase by fusion mutagenesis. *Planta* **239**(4): 753-763.



798 **Tardif M, Atteia A, Specht M, Cogne G, Rolland N, Brugiere S, Hippler M, Ferro M, Bruley C, Peltier**  
799 **G, et al. 2012.** PredAlgo: a new subcellular localization prediction tool dedicated to green  
800 algae. *Mol Biol Evol* **29**(12): 3625-3639.

801 **Tasaka Y, Gombos Z, Nishiyama Y, Mohanty P, Ohba T, Ohki K, Murata N. 1996.** Targeted  
802 mutagenesis of acyl-lipid desaturases in *Synechocystis*: evidence for the important roles of  
803 polyunsaturated membrane lipids in growth, respiration and photosynthesis. *Embo J* **15**(23):  
804 6416-6425.

805 **Tonon T, Sayanova O, Michaelson LV, Qing R, Harvey D, Larson TR, Li Y, Napier JA, Graham IA.**  
806 **2005.** Fatty acid desaturases from the microalga *Thalassiosira pseudonana*. *Febs J* **272**(13):  
807 3401-3412.

808 **Vijayan P, Browse J. 2002.** Photoinhibition in mutants of *Arabidopsis* deficient in thylakoid  
809 unsaturation. *Plant Physiol* **129**(2): 876-885.

810 **Voinnet O, Rivas S, Mestre P, Baulcombe D. 2003.** An enhanced transient expression system in  
811 plants based on suppression of gene silencing by the p19 protein of tomato bushy stunt  
812 virus. *Plant J* **33**(5): 949-956.

813 **Wagner M, Hoppe K, Czabany T, Heilmann M, Daum G, Feussner I, Fulda M. 2010.** Identification and  
814 characterization of an acyl-CoA:diacylglycerol acyltransferase 2 (DGAT2) gene from the  
815 microalga *O. tauri*. *Plant Physiol Biochem* **48**(6): 407-416.

816 **Wang H, Klein MG, Zou H, Lane W, Snell G, Levin I, Li K, Sang BC. 2015.** Crystal structure of human  
817 stearoyl-coenzyme A desaturase in complex with substrate. *Nat Struct Mol Biol* **22**(7): 581-  
818 585.

819 **Wang K, Froehlich JE, Zienkiewicz A, Hersh HL, Benning C. 2017.** A Plastid Phosphatidylglycerol  
820 Lipase Contributes to the Export of Acyl Groups from Plastids for Seed Oil Biosynthesis. *Plant*  
821 *Cell* **29**(7): 1678-1696.

822 **Wang M, Chen H, Gu Z, Zhang H, Chen W, Chen YQ. 2013.** omega3 fatty acid desaturases from  
823 microorganisms: structure, function, evolution, and biotechnological use. *Appl Microbiol*  
824 *Biotechnol* **97**(24): 10255-10262.

825 **Watanabe K, Ohno M, Taguchi M, Kawamoto S, Ono K, Aki T. 2016.** Identification of amino acid  
826 residues that determine the substrate specificity of mammalian membrane-bound front-end  
827 fatty acid desaturases. *J Lipid Res* **57**(1): 89-99.

828 **Williams JGK 1988.** [85] Construction of specific mutations in photosystem II photosynthetic reaction  
829 center by genetic engineering methods in *Synechocystis* 6803. *Methods in Enzymology*:  
830 Academic Press, 766-778.

831 **Yang W, Wittkopp TM, Li X, Warakanont J, Dubini A, Catalanotti C, Kim RG, Nowack EC, Mackinder**  
832 **LC, Aksoy M, et al. 2015.** Critical role of *Chlamydomonas reinhardtii* ferredoxin-5 in  
833 maintaining membrane structure and dark metabolism. *Proc Natl Acad Sci U S A* **112**(48):  
834 14978-14983.



835 **Zauner S, Jochum W, Bigorowski T, Benning C. 2012.** A cytochrome b5-containing plastid-located  
 836 fatty acid desaturase from *Chlamydomonas reinhardtii*. *Eukaryot Cell* **11**(7): 856-863.

837

838

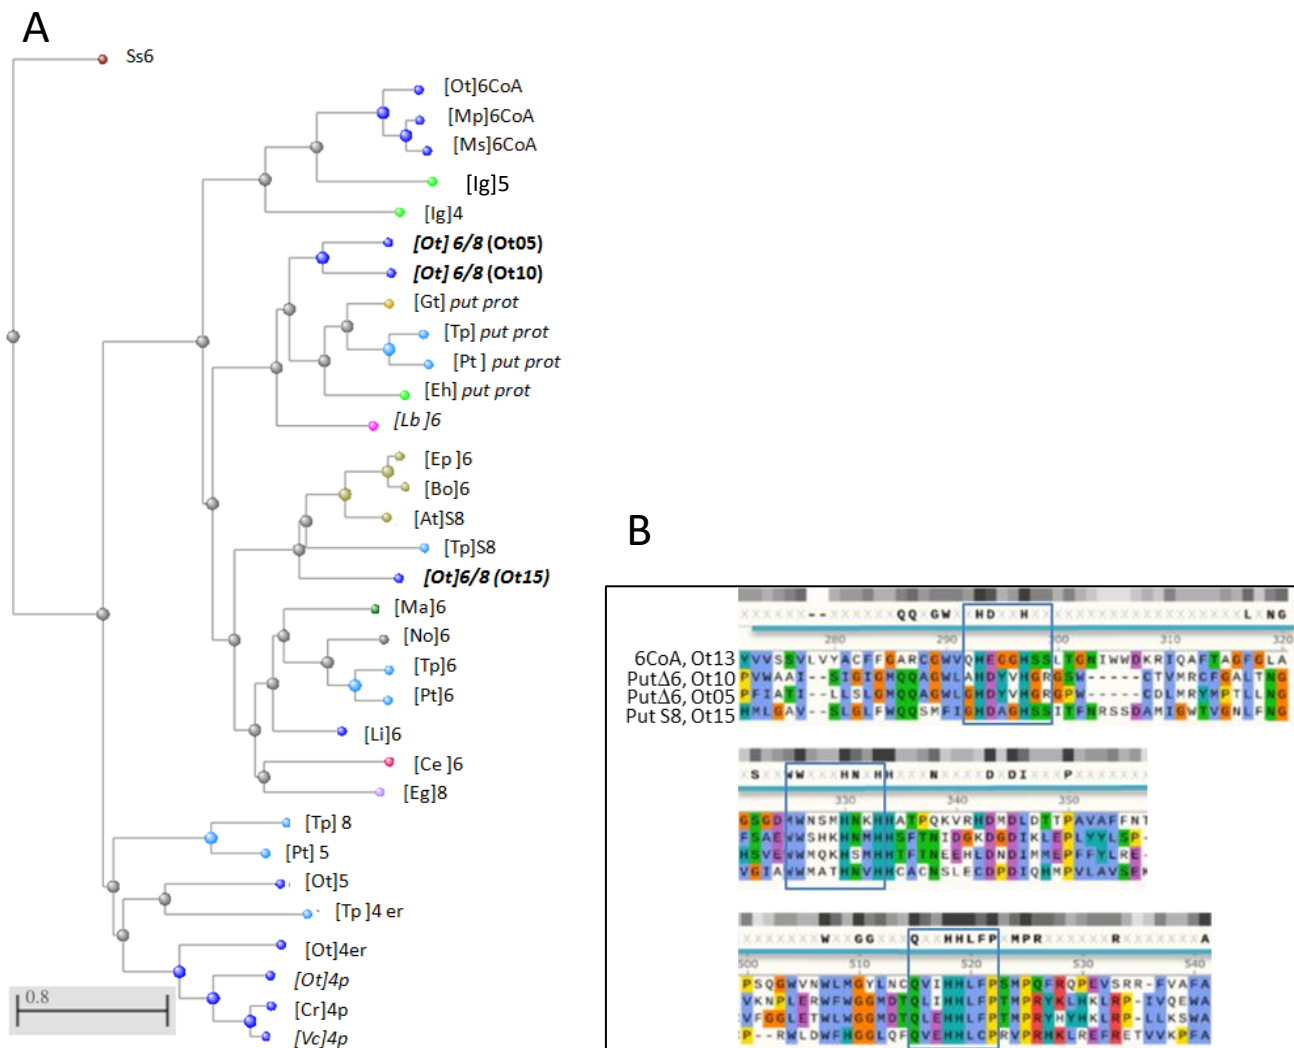

Figure 1. *O. tauri* front-end DES sequence features. **A**. Phylogenetic tree of *O. tauri* front-end DES and closest related homologs (Fast minimum evolution method). Species are indicated in brackets, numbering refers to putative (Italics) or assessed DES  $\Delta$ -regiospecificity. S, sphingolipid-DES; p, plastidial DES; er, microsomal DES; 6CoA, acyl-CoA  $\Delta$ 6-DES. The three  $\Delta$ 6/8-DES candidates are in bold and their label used in this paper in brackets. Colors of nodes refer to the taxonomic groups: cyanobacteria (purple), eukaryotes (gray), green algae (deep blue), eudicots (beige), cryptomonads (light blue), haptophytes (light green), cryptomonads (yellow), euglenoids (pale pink) kinetoplastids (bright pink), fungi (deep green) nematods (red). [At] *Arabidopsis thaliana*, [Bo] *Borago officinalis*, [Ce] *Caenorabditis elegans*, [Cr] *Chlamydomonas reinhardtii*, [Ep] *Echium plantagineum*, [Eg] *Euglena gracilis*, [Eh] *Emiliana huxleyi*, [Gt] *Guillardia theta* CCMP2712, [Ig] *Isochrisis galbana*, [Lb] *Leishmania braziliensis*, [Li] *Lobosphaera incisa*, [Ma] *Mortierella alpine*, [Mp] *Micromonas pusilla*, [Ms] *Mantoniella squamata*, [No] *Nannochloropsis oculata*, [Ot] *Ostreococcus tauri*, [Pt] *Phaeodactylum tricornutum*, [Vc] *Volvox carteri*, [SS] *Synechocystis* sp PCC6803, [Tp] *Thalassiosira pseudonana*. **B**. Alignment of the acyl-CoA- $\Delta$ 6-DES and the three  $\Delta$ 6/8-DES candidates in the histidine-box regions. Histidine-box motifs are in blue frames. Color highlighting is based on physical properties and conservation (clustal Omega): positive (red), negative (purple), polar (green), hydrophobic (blue), aromatic (turquoise), glutamine (orange), proline (yellow). Grey blocks highlight conservation only.

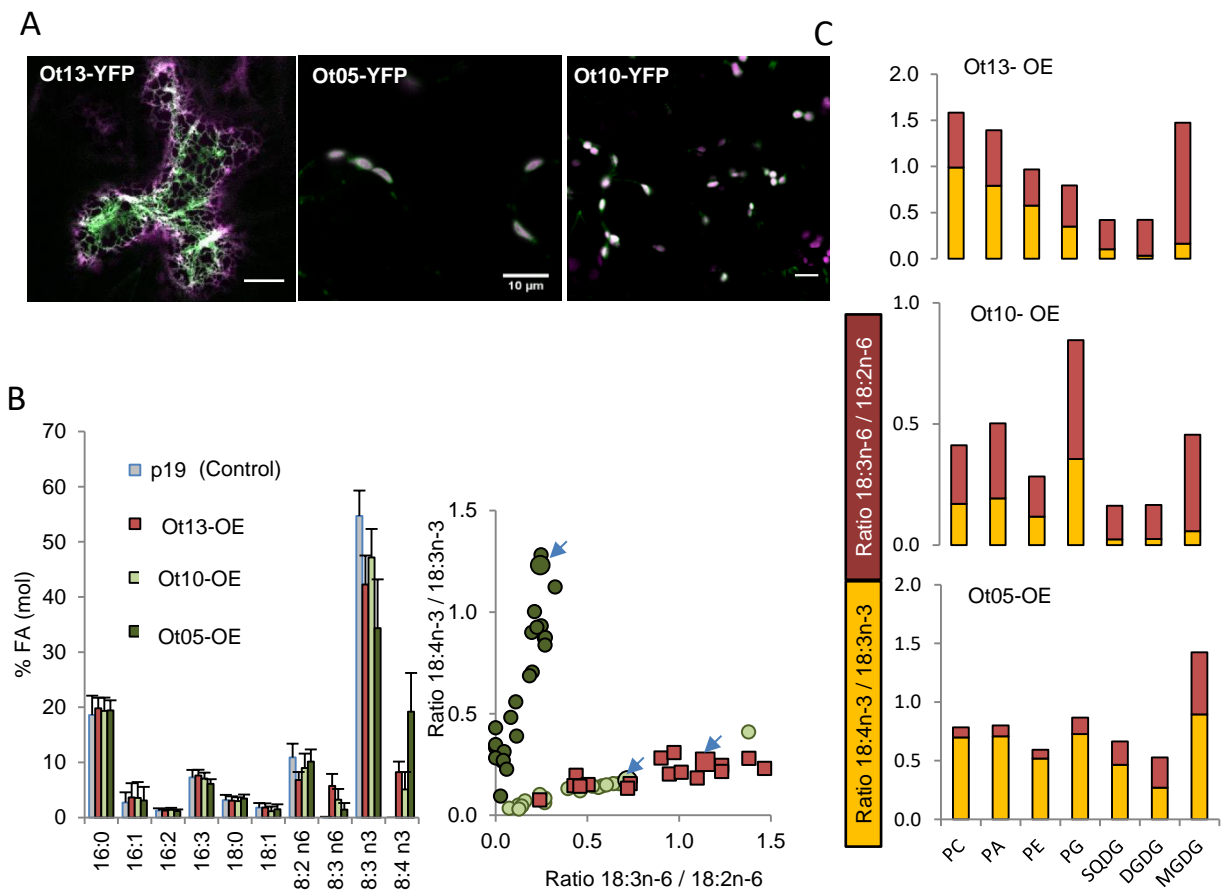

Figure 2. Localization and activities of *O. tauri* acyl-CoA  $\Delta 6$ -DES and  $\Delta 6$ -DES candidates in *N. benthamiana*. **A**. Sub-cellular localisation of transiently overexpressed full-length Ct-YFP-fused proteins. Images merged from YFP chlorophyll or ER-marker (Acyl-CoA- $\Delta 6$ -DES) fluorescences are shown. Experiments were repeated at least twice. Images represent 100% of the observed cells (n). n=16 for Ot13-YFP (Acyl-CoA- $\Delta 6$ -DES), n =25 for Ot05-YFP, n=21 for Ot10-YFP. Bar, 10 $\mu$ m. **B**. FA-profiles of DES overexpressors. Means and standard deviations of n independent experiments are plotted as histogram and the relative production of  $\omega$ -3 C18-PUFA (18:4n-3/18:3n-3) and  $\omega$ -6 C18-PUFA (18:3n-6/18:2n-6) in each experiment are shown in dot clouds. Dots corresponding to leaves used for the lipids analysis showed in C are indicated by blue arrows. Control lines (p19) n=27, Ot13-OE n=17, Ot10-OE n=21, Ot05-OE n=29. **C**. Relative production of  $\omega$ -3 and  $\omega$ -6 C18-PUFA in glycerolipids. Cumulative ratio of pmol percent are plotted 18:4n-3/18:3n-3 yellow bars, 18:3n-6/18:2n-6 red bars. On representative experiment out of two is shown (Fig. S7).

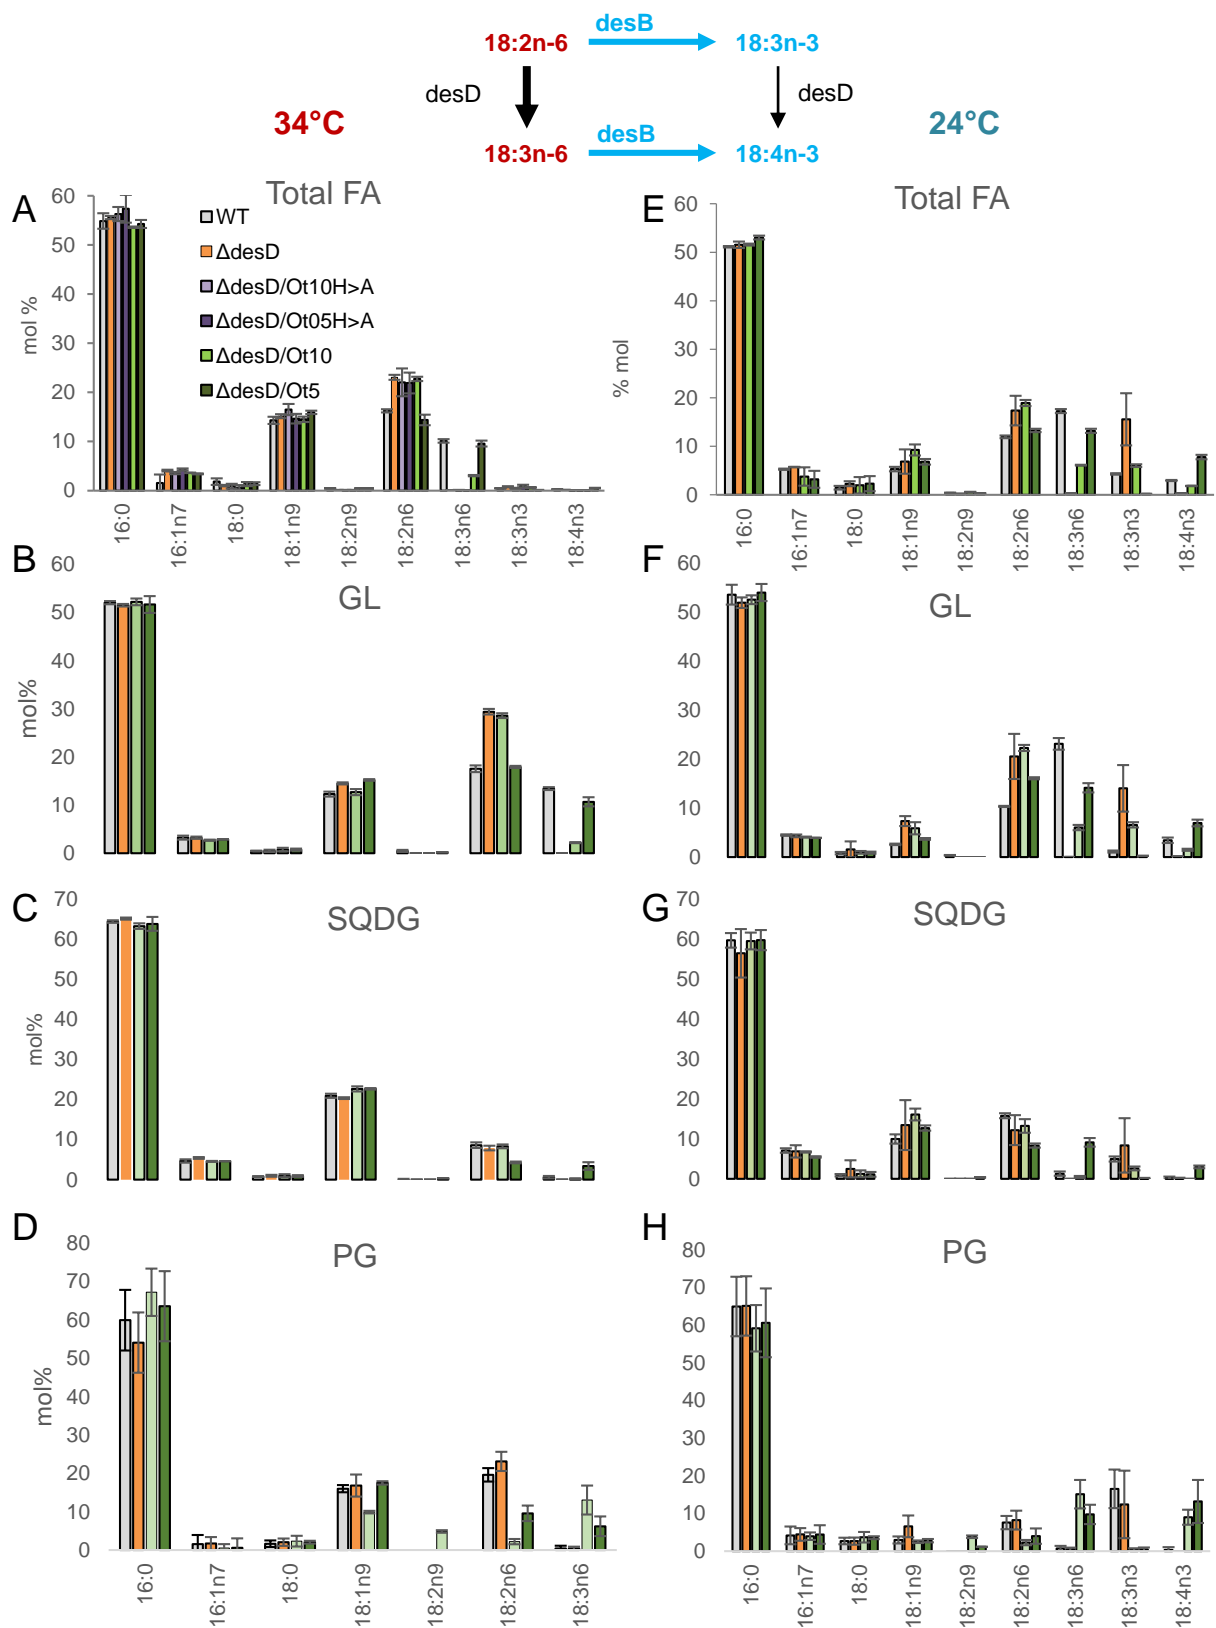

Figure 3. Glycerolipid analysis of  $\Delta\text{desD}$  *Synechocystis* PCC6803 Ot5-OE and Ot10- OE. Upper drawing indicates the respective role of desD and desB for the regulation of C18-PUFA in *Synechocystis* PCC6803. C18-PUFA present at 34°C are highlighted in red, those present at 24°C in blue. FA profile of glycerolipids at 34°C (**A**, **B**, **C**, **D**) and 24°C (**E**, **F**, **G**, **H**). Means and standard deviations of three independent experiments are shown. MGDG and DGDG displayed similar alterations and were cumulated (GL for galactolipids).

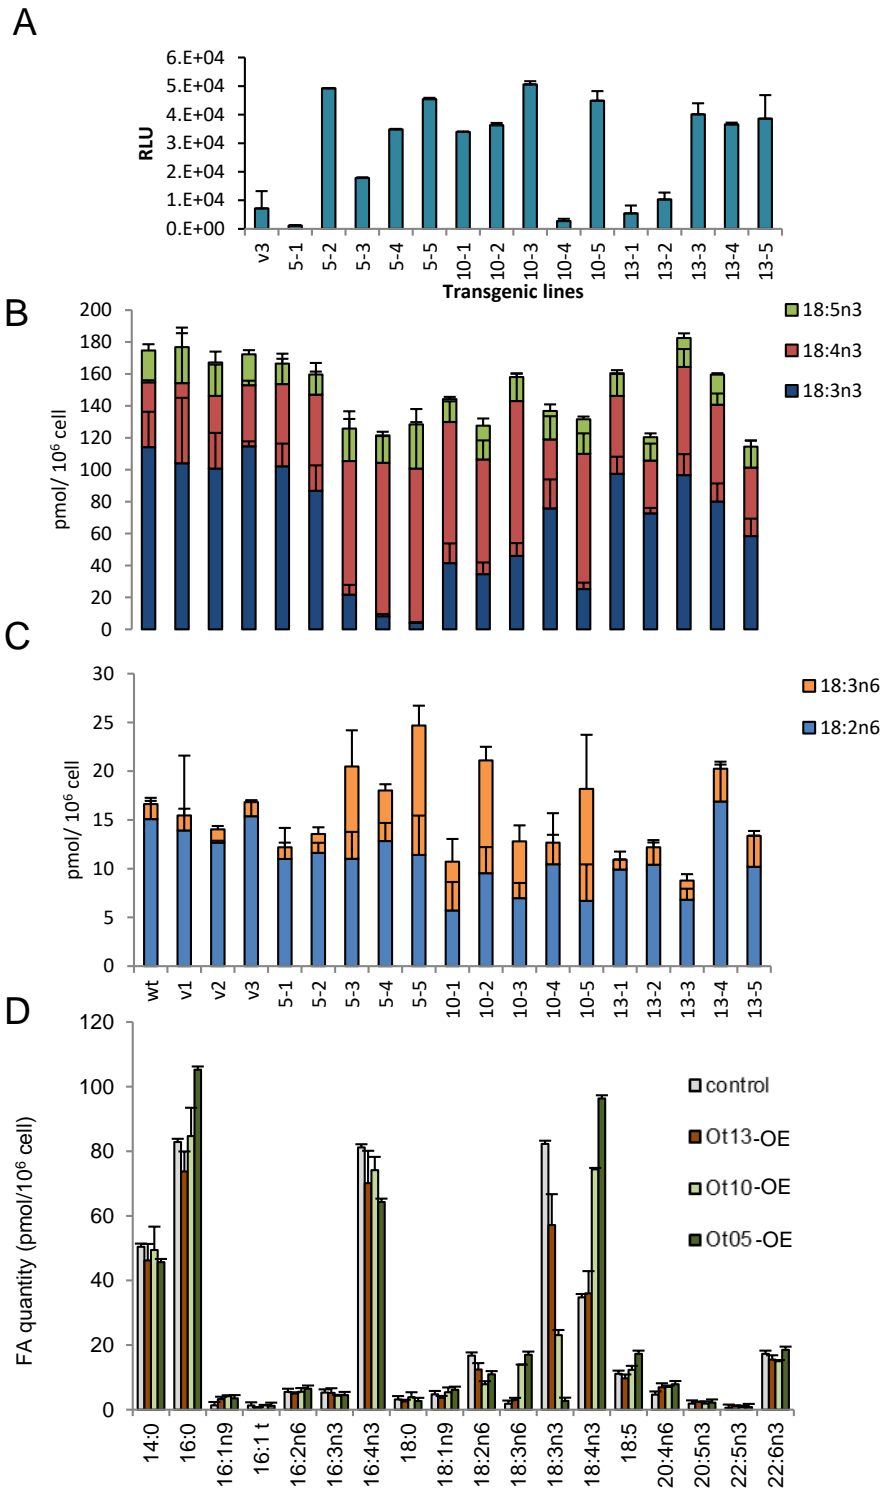

Figure 4. Glycerolipid features of *O. tauri*  $\Delta 6$ -DES-overexpressors. **A.** Luminescence of transgenic lines (Relative Luminescence Units from 200 $\mu$ l). Mean of triplicate and standard deviations are shown. **B** cellular amount of  $\omega$ -3-C18-PUFA **C.** C18-PUFA cellular amount of  $\omega$ -6-C18-PUFA. The labels v, 5, 10 and 13 correspond to lines transformed with empty vector, Ot5, Ot10 and Ot13 respectively. **D.** Total glycerolipid FA profiles of lines selected for detailed lipid analysis (0t05-5, Ot10-5, Ot13-5). B to D. Means of triplicate independent experiments and standard deviation are shown.

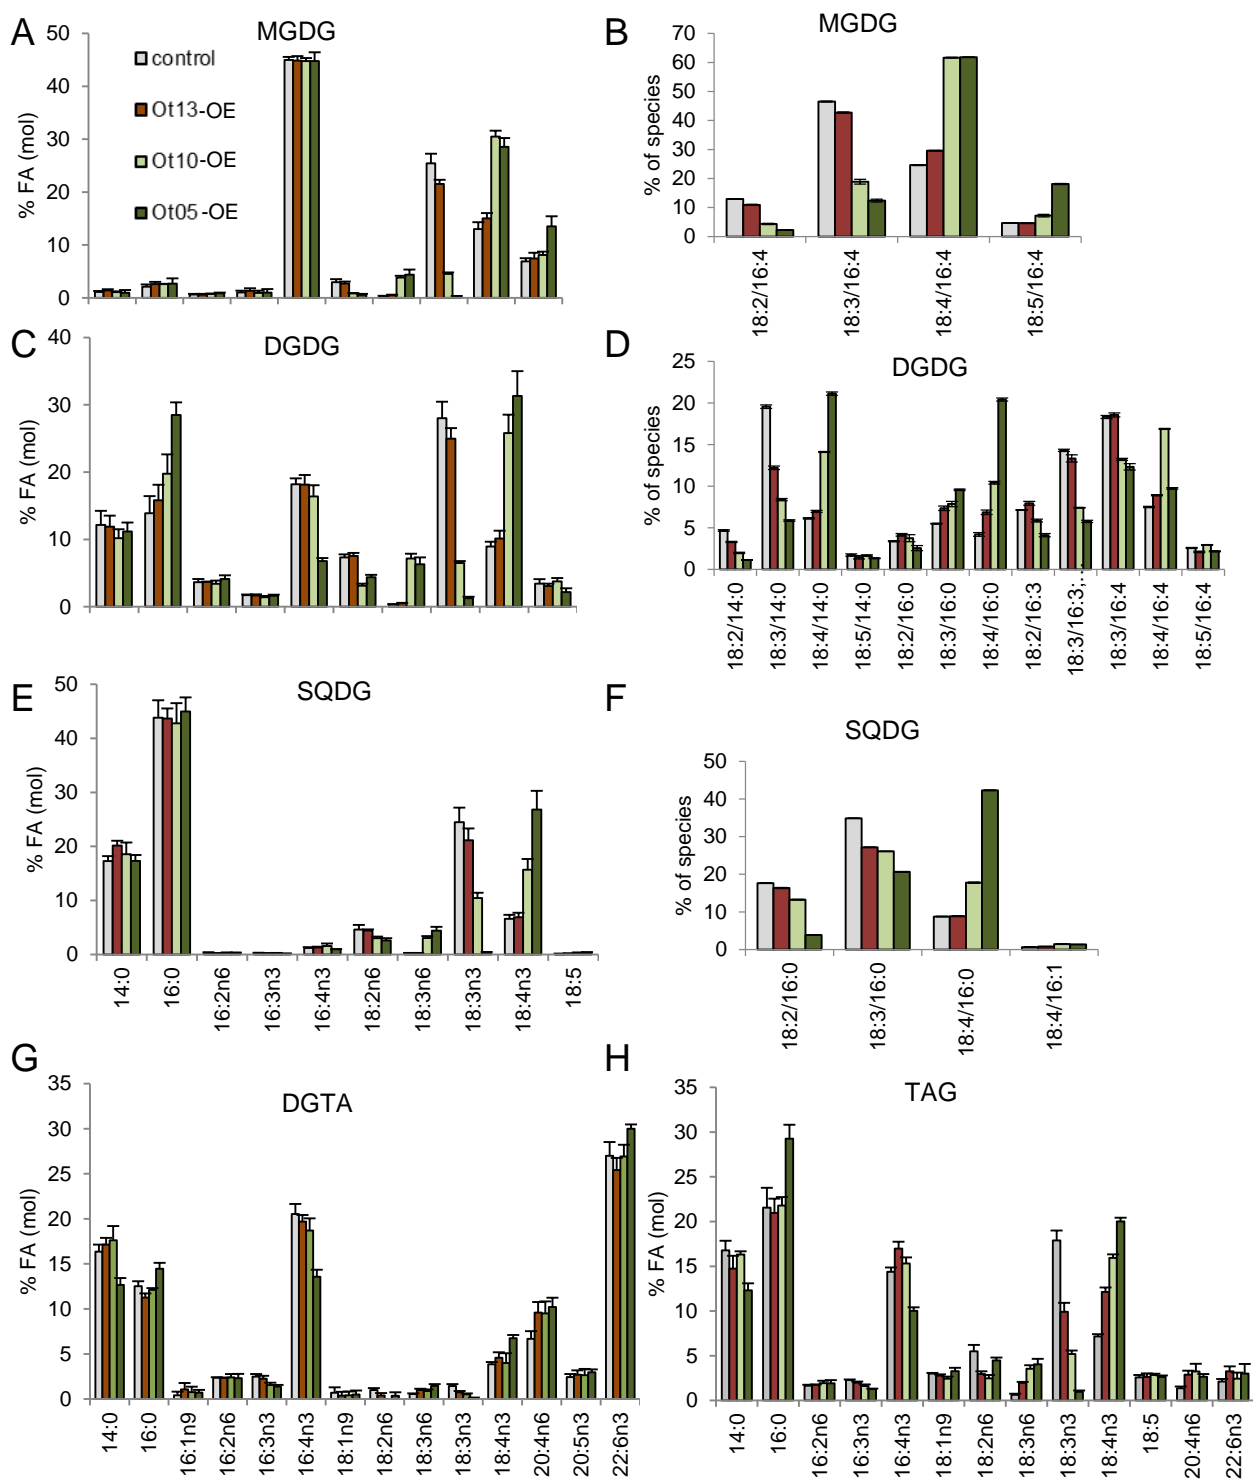

Figure 5. Detailed Lipid analysis of *O. tauri*  $\Delta 6$ -DES overexpressors. **A to F**. Major plastidic glycerolipids. **G, H**. Extraplastidic glycerolipids. For FA-profile analyses, (A,C,E,F,G,H) means and standard deviations of three independent experiments are shown; control line contains the empty vector. **B, D, F**. C18-PUFA molecular species analysis of major plastidic lipids. Means and standard deviations of technical triplicate are shown. Samples used for this analysis are independent from those used for GC-FID analysis; control line is the wild-type (WT).

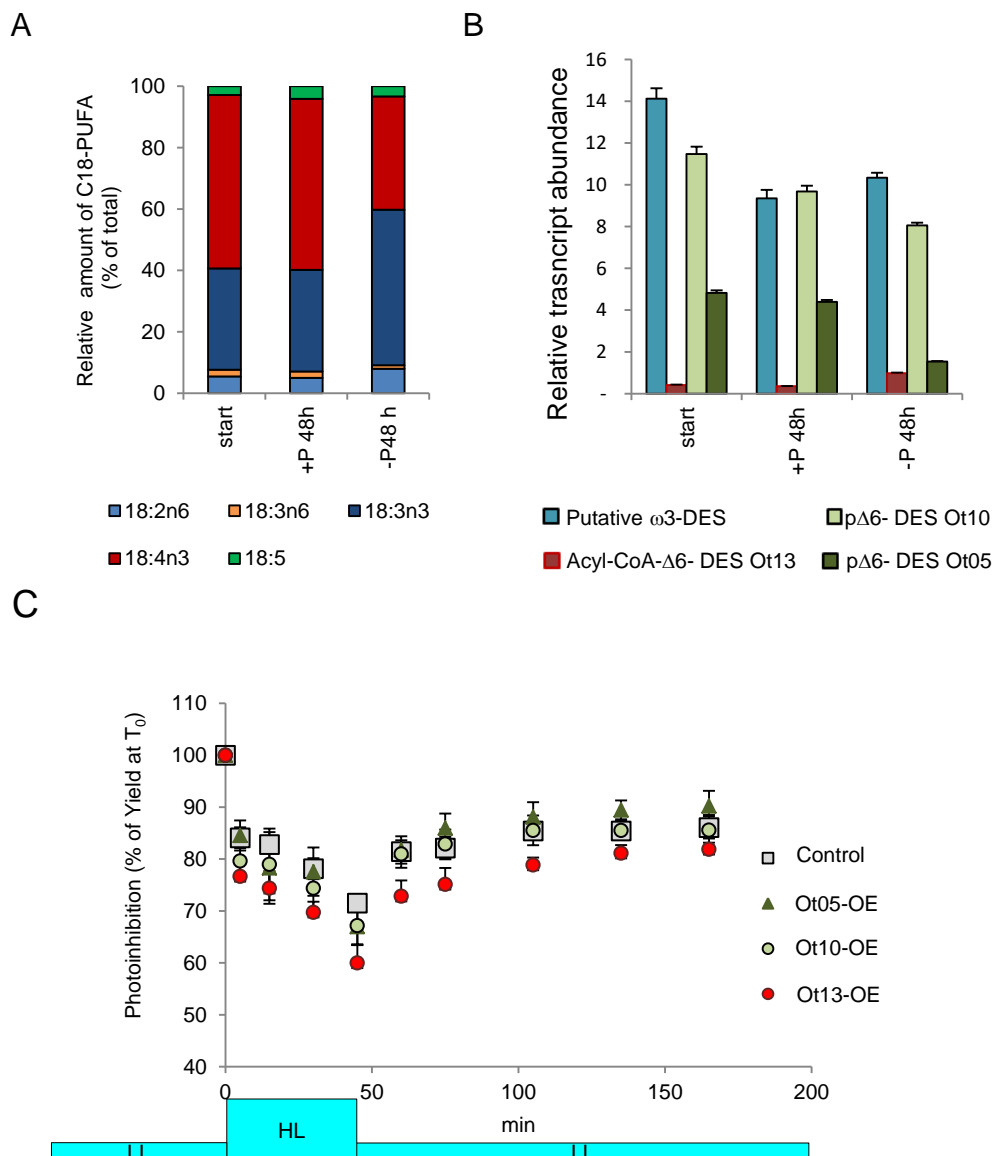

Figure 6. Phosphate limitation and  $\Delta$ 6-DES regulation in *O. tauri*. **A-B**. Impact of phosphate deprivation on C18-PUFA proportion (A) and desaturases transcript levels (B). **C**. Photosynthetic inhibition responses of *O. tauri*  $\Delta$ 6-DES-OE in phosphate-limited conditions. Photosynthesis efficiency (Yield) was assessed under 30  $\mu\text{mol}/\text{m}^2/\text{s}$  (low light LL; Fig. S14) before light intensity was increased for 45 min to 120  $\mu\text{mol}/\text{m}^2/\text{s}$  (high light HL: photoinhibition) and put back to 30  $\mu\text{mol}/\text{m}^2/\text{s}$  (LL: recovery). Values are expressed as the percentage of each culture's yield before photoinhibition ( $T_0$ ). Means ( $\pm$  standard deviations) of triplicates from independent cultures are shown. Cell density for control (i.e. empty vector transgenic), Ot13-OE, Ot10-OE, Ot05-OE was in average, 48, 44, 32 and 48.10<sup>6</sup> cell/ml respectively.



## Parsed Citations

**Abida H, Dolch LJ, Mei C, Villanova V, Conte M, Block MA, Finazzi G, Bastien O, Tirichine L, Bowler C, et al. 2015. Membrane glycerolipid remodeling triggered by nitrogen and phosphorus starvation in *Phaeodactylum tricornutum*. *Plant Physiol* 167(1): 118-136.**

Pubmed: [Author and Title](#)

Google Scholar: [Author Only](#) [Title Only](#) [Author and Title](#)

**Ahmann K, Heilmann M, Feussner I. 2011. Identification of a Delta4-desaturase from the microalga *Ostreococcus lucimarinus*. *European Journal of Lipid Science and Technology* 113: 832-840.**

Pubmed: [Author and Title](#)

Google Scholar: [Author Only](#) [Title Only](#) [Author and Title](#)

**Alakhverdiev SI, Los DA, Murata N 2009. Regulatory Roles in Photosynthesis of Unsaturated Fatty Acids in Membrane Lipids. In: Wada H, Murata N eds. *Lipids in Photosynthesis: Essential and Regulatory Functions*. Dordrecht: Springer Netherlands, 373-388.**

Pubmed: [Author and Title](#)

Google Scholar: [Author Only](#) [Title Only](#) [Author and Title](#)

**Browse J, McCourt P, Somerville C. 1986a. A mutant of *Arabidopsis* deficient in c(18:3) and c(16:3) leaf lipids. *Plant Physiol* 81(3): 859-864.**

Pubmed: [Author and Title](#)

Google Scholar: [Author Only](#) [Title Only](#) [Author and Title](#)

**Browse J, Warwick N, Somerville CR, Slack CR. 1986b. Fluxes through the prokaryotic and eukaryotic pathways of lipid synthesis in the '16:3' plant *Arabidopsis thaliana*. *Biochem J* 235(1): 25-31.**

Pubmed: [Author and Title](#)

Google Scholar: [Author Only](#) [Title Only](#) [Author and Title](#)

**Campbell DA, Tyystjarvi E. 2012. Parameterization of photosystem II photoinactivation and repair. *Biochim Biophys Acta* 1817(1): 258-265.**

Pubmed: [Author and Title](#)

Google Scholar: [Author Only](#) [Title Only](#) [Author and Title](#)

**Chrétiennot-Dinet M-J, Courties C, Vaquer A, Neveux J, Claustre H, Lautier J, Machado MC. 1995. A new marine picoeucaryote: *Ostreococcus tauri* gen. et sp. nov. (Chlorophyta, Prasinophyceae). *Phycologia* 34(4): 285-292.**

Pubmed: [Author and Title](#)

Google Scholar: [Author Only](#) [Title Only](#) [Author and Title](#)

**Corellou F, Schwartz C, Motta JP, Djouani-Tahri el B, Sanchez F, Bouget FY. 2009. Clocks in the green lineage: comparative functional analysis of the circadian architecture of the picoeucaryote *ostreococcus*. *Plant Cell* 21(11): 3436-3449.**

Pubmed: [Author and Title](#)

Google Scholar: [Author Only](#) [Title Only](#) [Author and Title](#)

**Courties C, Vaquer A, RTrousselier M, Lautier J, Chrétiennot-Dinet M-J, Neveux J, Machado C. 1994. Smallest eukaryotic organism. *Nature* 370: 255.**

Pubmed: [Author and Title](#)

Google Scholar: [Author Only](#) [Title Only](#) [Author and Title](#)

**Degraeve-Guilbault C, Bréhélin C, Haslam R, Sayanova O, Marie-Luce G, Jouhet J, Corellou F. 2017. Glycerolipid Characterization and Nutrient Deprivation-Associated Changes in the Green Picoalga *Ostreococcus tauri*. *Plant Physiology* 173(4): 2060-2080.**

Pubmed: [Author and Title](#)

Google Scholar: [Author Only](#) [Title Only](#) [Author and Title](#)

**Derelle E, Ferraz C, Rombauts S, Rouze P, Worden AZ, Robbens S, Partensky F, Degroove S, Echeynie S, Cooke R, et al. 2006. Genome analysis of the smallest free-living eukaryote *Ostreococcus tauri* unveils many unique features. *Proc Natl Acad Sci U S A* 103(31): 11647-11652.**

Pubmed: [Author and Title](#)

Google Scholar: [Author Only](#) [Title Only](#) [Author and Title](#)

**Domergue F, Abbadi A, Ott C, Zank TK, Zahringer U, Heinz E. 2003. Acyl carriers used as substrates by the desaturases and elongases involved in very long-chain polyunsaturated fatty acids biosynthesis reconstituted in yeast. *J Biol Chem* 278(37): 35115-35126.**

Pubmed: [Author and Title](#)

Google Scholar: [Author Only](#) [Title Only](#) [Author and Title](#)

**Domergue F, Abbadi A, Zahringer U, Moreau H, Heinz E. 2005. In vivo characterization of the first acyl-CoA Delta6-desaturase from a member of the plant kingdom, the microalga *Ostreococcus tauri*. *Biochem J* 389(Pt 2): 483-490.**

Pubmed: [Author and Title](#)

Google Scholar: [Author Only](#) [Title Only](#) [Author and Title](#)

**Domergue F, Lerchl J, Zahringer U, Heinz E. 2002. Cloning and functional characterization of *Phaeodactylum tricornutum* front-end desaturases involved in eicosapentaenoic acid biosynthesis. *Eur J Biochem* 269(16): 4105-4113.**

Pubmed: [Author and Title](#)

Google Scholar: [Author Only](#) [Title Only](#) [Author and Title](#)

**Domergue F, Vishwanath SJ, Joubès J, Ono J, Lee JA, Bourdon M, Alhattab R, Lowe C, Pascal S, Lessire R, et al. 2010. Three**

**Arabidopsis fatty acyl-coenzyme A reductases, FAR1, FAR4, and FAR5, generate primary fatty alcohols associated with suberin deposition. Plant Physiology 153(4): 1539-1554.**

Pubmed: [Author and Title](#)

Google Scholar: [Author Only](#) [Title Only](#) [Author and Title](#)

**Gombos Z, Wada H, Murata N. 1992. Unsaturation of fatty acids in membrane lipids enhances tolerance of the cyanobacterium Synechocystis PCC6803 to low-temperature photoinhibition. Proc Natl Acad Sci U S A 89(20): 9959-9963.**

Pubmed: [Author and Title](#)

Google Scholar: [Author Only](#) [Title Only](#) [Author and Title](#)

**Grimsley N, Pequin B, Bachy C, Moreau H, Piganeau G. 2010. Cryptic sex in the smallest eukaryotic marine green alga. Mol Biol Evol 27(1): 47-54.**

Pubmed: [Author and Title](#)

Google Scholar: [Author Only](#) [Title Only](#) [Author and Title](#)

**Hamilton ML, Powers S, Napier JA, Sayanova O. 2016. Heterotrophic Production of Omega-3 Long-Chain Polyunsaturated Fatty Acids by Trophically Converted Marine Diatom Phaeodactylum tricornutum. Mar Drugs 14(3).**

Pubmed: [Author and Title](#)

Google Scholar: [Author Only](#) [Title Only](#) [Author and Title](#)

**Heilmann I, Mekhedov S, King B, Browse J, Shanklin J. 2004a. Identification of the Arabidopsis palmitoyl-monogalactosyldiacylglycerol delta7-desaturase gene FAD5, and effects of plastidial retargeting of Arabidopsis desaturases on the fad5 mutant phenotype. Plant Physiol 136(4): 4237-4245.**

Pubmed: [Author and Title](#)

Google Scholar: [Author Only](#) [Title Only](#) [Author and Title](#)

**Heilmann I, Pidkowich MS, Girke T, Shanklin J. 2004b. Switching desaturase enzyme specificity by alternate subcellular targeting. Proc Natl Acad Sci U S A 101(28): 10266-10271.**

Pubmed: [Author and Title](#)

Google Scholar: [Author Only](#) [Title Only](#) [Author and Title](#)

**Higashi Y, Okazaki Y, Takano K, Myouga F, Shinozaki K, Knoch E, Fukushima A, Saito K. 2018. HEAT INDUCIBLE LIPASE1 Remodels Chloroplastic Monogalactosyldiacylglycerol by Liberating  $\alpha$ -Linolenic Acid in Arabidopsis Leaves under Heat Stress. The Plant Cell 30(8): 1887-1905.**

Pubmed: [Author and Title](#)

Google Scholar: [Author Only](#) [Title Only](#) [Author and Title](#)

**Hoffmann M, Wagner M, Abbadi A, Fulda M, Feussner I. 2008. Metabolic engineering of omega3-very long chain polyunsaturated fatty acid production by an exclusively acyl-CoA-dependent pathway. J Biol Chem 283(33): 22352-22362.**

Pubmed: [Author and Title](#)

Google Scholar: [Author Only](#) [Title Only](#) [Author and Title](#)

**Jonasdottir SH. 2019. Fatty Acid Profiles and Production in Marine Phytoplankton. Mar Drugs 17(3).**

Pubmed: [Author and Title](#)

Google Scholar: [Author Only](#) [Title Only](#) [Author and Title](#)

**Jouhet J, Marechal E, Baldan B, Bligny R, Joyard J, Block MA. 2004. Phosphate deprivation induces transfer of DGDG galactolipid from chloroplast to mitochondria. J Cell Biol 167(5): 863-874.**

Pubmed: [Author and Title](#)

Google Scholar: [Author Only](#) [Title Only](#) [Author and Title](#)

**Karimi M, Inze D, Depicker A. 2002. GATEWAY vectors for Agrobacterium-mediated plant transformation. Trends Plant Sci 7(5): 193-195.**

Pubmed: [Author and Title](#)

Google Scholar: [Author Only](#) [Title Only](#) [Author and Title](#)

**Khozin-Goldberg I, Cohen Z. 2006. The effect of phosphate starvation on the lipid and fatty acid composition of the fresh water eustigmatophyte Monodus subterraneus. Phytochemistry 67(7): 696-701.**

Pubmed: [Author and Title](#)

Google Scholar: [Author Only](#) [Title Only](#) [Author and Title](#)

**Khozin-Goldberg I, Leu S, Boussiba S. 2016. Microalgae as a Source for VLC-PUFA Production. Subcell Biochem 86: 471-510.**

Pubmed: [Author and Title](#)

Google Scholar: [Author Only](#) [Title Only](#) [Author and Title](#)

**Kim Y, Terng EL, Riekhof WR, Cahoon EB, Cerutti H. 2018. Endoplasmic reticulum acyltransferase with prokaryotic substrate preference contributes to triacylglycerol assembly in Chlamydomonas. Proceedings of the National Academy of Sciences.**

Pubmed: [Author and Title](#)

Google Scholar: [Author Only](#) [Title Only](#) [Author and Title](#)

**Kotajima T, Shiraiwa Y, Suzuki I. 2014. Functional screening of a novel Delta15 fatty acid desaturase from the coccolithophorid Emiliania huxleyi. Biochim Biophys Acta 1842(10): 1451-1458.**

Pubmed: [Author and Title](#)

Google Scholar: [Author Only](#) [Title Only](#) [Author and Title](#)

**Kugler A, Zorin B, Didi-Cohen S, Sibiryak M, Gorelova O, Ismagulova T, Kokabi K, Kumari P, Lukyanov A, Boussiba S, et al. 2019. Long-**

**Chain Polyunsaturated Fatty Acids in the Green Microalga *Lobosphaera incisa* Contribute to Tolerance to Abiotic Stresses.** *Plant Cell Physiol* 60(6): 1205-1223.

Pubmed: [Author and Title](#)

Google Scholar: [Author Only](#) [Title Only](#) [Author and Title](#)

**Kumar R, Tran LS, Neelakandan AK, Nguyen HT. 2012. Higher plant cytochrome b5 polypeptides modulate fatty acid desaturation.** *PLoS ONE* 7(2): e31370.

Pubmed: [Author and Title](#)

Google Scholar: [Author Only](#) [Title Only](#) [Author and Title](#)

**Lang I, Hodac L, Friedl T, Feussner I. 2011. Fatty acid profiles and their distribution patterns in microalgae: a comprehensive analysis of more than 2000 strains from the SAG culture collection.** *BMC Plant Biol* 11: 124.

Pubmed: [Author and Title](#)

Google Scholar: [Author Only](#) [Title Only](#) [Author and Title](#)

**Leblond JD, McDaniel SL, Lowrie SD, Khadka M, Dahmen J. 2019. Mono- and digalactosyldiacylglycerol composition of dinoflagellates. VIII. Temperature effects and a perspective on the curious case of *Karenia mikimotoi* as a producer of the unusual, 'green algal' fatty acid hexadecatetraenoic acid [16:4(n-3)].** *European Journal of Phycology* 54(1): 78-90.

Pubmed: [Author and Title](#)

Google Scholar: [Author Only](#) [Title Only](#) [Author and Title](#)

**Lee JM, Lee H, Kang S, Park WJ. 2016. Fatty Acid Desaturases, Polyunsaturated Fatty Acid Regulation, and Biotechnological Advances.** *Nutrients* 8(1).

Pubmed: [Author and Title](#)

Google Scholar: [Author Only](#) [Title Only](#) [Author and Title](#)

**Leliaert F, Smith DR, Moreau H, Herron MD, Verbruggen H, Delwiche CF, De Clerck O. 2012. Phylogeny and Molecular Evolution of the Green Algae. Critical Reviews in Plant Sciences** 31(1): 1-46.

Pubmed: [Author and Title](#)

Google Scholar: [Author Only](#) [Title Only](#) [Author and Title](#)

**Li-Beisson Y, Beisson F, Riekhof W. 2015. Metabolism of acyl-lipids in *Chlamydomonas reinhardtii*.** *Plant J* 82(3): 504-522.

Pubmed: [Author and Title](#)

Google Scholar: [Author Only](#) [Title Only](#) [Author and Title](#)

**Li D, Moorman R, Vanhercke T, Petrie J, Singh S, Jackson CJ. 2016. Classification and substrate head-group specificity of membrane fatty acid desaturases.** *Comput Struct Biotechnol J* 14: 341-349.

Pubmed: [Author and Title](#)

Google Scholar: [Author Only](#) [Title Only](#) [Author and Title](#)

**Li N, Xu C, Li-Beisson Y, Philippar K. 2016. Fatty Acid and Lipid Transport in Plant Cells.** *Trends Plant Sci* 21(2): 145-158.

Pubmed: [Author and Title](#)

Google Scholar: [Author Only](#) [Title Only](#) [Author and Title](#)

**Li X, Moellering ER, Liu B, Johnny C, Fedewa M, Sears BB, Kuo MH, Benning C. 2012. Agalactoglycerolipid lipase is required for triacylglycerol accumulation and survival following nitrogen deprivation in *Chlamydomonas reinhardtii*.** *Plant Cell* 24(11): 4670-4686.

Pubmed: [Author and Title](#)

Google Scholar: [Author Only](#) [Title Only](#) [Author and Title](#)

**López Alonso D, García-Maroto F, Rodríguez-Ruiz J, Garrido JA, Vilches MA. 2003. Evolution of the membrane-bound fatty acid desaturases.** *Biochemical Systematics and Ecology* 31(10): 1111-1124.

Pubmed: [Author and Title](#)

Google Scholar: [Author Only](#) [Title Only](#) [Author and Title](#)

**Los DA, Mironov KS, Alakhverdiev SI. 2013. Regulatory role of membrane fluidity in gene expression and physiological functions.** *Photosynthesis Research* 116(2): 489-509.

Pubmed: [Author and Title](#)

Google Scholar: [Author Only](#) [Title Only](#) [Author and Title](#)

**Meesapyodsuk D, Qiu X. 2012. The front-end desaturase: structure, function, evolution and biotechnological use.** *Lipids* 47(3): 227-237.

Pubmed: [Author and Title](#)

Google Scholar: [Author Only](#) [Title Only](#) [Author and Title](#)

**Miquel M, Browse J. 1992. Arabidopsis mutants deficient in polyunsaturated fatty acid synthesis. Biochemical and genetic characterization of a plant oleoyl-phosphatidylcholine desaturase.** *J Biol Chem* 267(3): 1502-1509.

Pubmed: [Author and Title](#)

Google Scholar: [Author Only](#) [Title Only](#) [Author and Title](#)

**Mironov KS, Sidorov RA, Trofimova MS, Bedbenov VS, Tsydendambaev VD, Alakhverdiev SI, Los DA. 2012. Light-dependent cold-induced fatty acid unsaturation, changes in membrane fluidity, and alterations in gene expression in *Synechocystis*.** *Biochim Biophys Acta* 1817(8): 1352-1359.

Pubmed: [Author and Title](#)

Google Scholar: [Author Only](#) [Title Only](#) [Author and Title](#)

**Moellering ER, Muthan B, Benning C. 2010. Freezing tolerance in plants requires lipid remodeling at the outer chloroplast membrane.**

Science 330(6001): 226-228.

Moulager M, Corellou F, Vergé V, Escande ML, Bouget FY. 2010. Integration of Light Signals by the Retinoblastoma Pathway in the Control of S phase Entry in the Picophytoplanktonic Cell *Ostreococcus* PLoS Genet.

Napier JA, Michaelson LV, Sayanova O. 2003. The role of cytochrome b5 fusion desaturases in the synthesis of polyunsaturated fatty acids. *Prostaglandins Leukot Essent Fatty Acids* 68(2): 135-143.

Pubmed: [Author and Title](#)

Google Scholar: [Author Only](#) [Title Only](#) [Author and Title](#)

Nguyen HM, Cuine S, Beyly-Adriano A, Legeret B, Billon E, Auroy P, Beisson F, Peltier G, Li-Beisson Y. 2013. The green microalga *Chlamydomonas reinhardtii* has a single omega-3 fatty acid desaturase that localizes to the chloroplast and impacts both plastidic and extraplastidic membrane lipids. *Plant Physiol* 163(2): 914-928.

Pubmed: [Author and Title](#)

Google Scholar: [Author Only](#) [Title Only](#) [Author and Title](#)

Ohlrogge J, Browse J. 1995. Lipid biosynthesis. *Plant Cell* 7(7): 957-970.

Pubmed: [Author and Title](#)

Google Scholar: [Author Only](#) [Title Only](#) [Author and Title](#)

Peltomaa E, Hallfors H, Taipale SJ. 2019. Comparison of Diatoms and Dinoflagellates from Different Habitats as Sources of PUFAs. *Mar Drugs* 17(4).

Pubmed: [Author and Title](#)

Google Scholar: [Author Only](#) [Title Only](#) [Author and Title](#)

Roman A, Hernandez ML, Soria-Garcia A, Lopez-Gomollon S, Lagunas B, Picorel R, Martinez-Rivas JM, Alfonso M. 2015. Non-redundant Contribution of the Plastidial FAD8 omega-3 Desaturase to Glycerolipid Unsaturation at Different Temperatures in *Arabidopsis*. *Mol Plant* 8(11): 1599-1611.

Pubmed: [Author and Title](#)

Google Scholar: [Author Only](#) [Title Only](#) [Author and Title](#)

Ruiz-López N, Sayanova O, Napier JA, Haslam RP. 2012. Metabolic engineering of the omega-3 long chain polyunsaturated fatty acid biosynthetic pathway into transgenic plants. *Journal of Experimental Botany* 63(7): 2397-2410.

Pubmed: [Author and Title](#)

Google Scholar: [Author Only](#) [Title Only](#) [Author and Title](#)

Sallal AK, Nimer NA, Radwan SS. 1990. Lipid and fatty acid composition of freshwater cyanobacteria. *Microbiology* 136(10): 2043-2048.

Pubmed: [Author and Title](#)

Google Scholar: [Author Only](#) [Title Only](#) [Author and Title](#)

Sayanova O, Shewry PR, Napier JA. 1999. Histidine-41 of the cytochrome b5 domain of the borage delta6 fatty acid desaturase is essential for enzyme activity. *Plant Physiol* 121(2): 641-646.

Pubmed: [Author and Title](#)

Google Scholar: [Author Only](#) [Title Only](#) [Author and Title](#)

Sayanova O, Smith MA, Lapinskas P, Stobart AK, Dobson G, Christie WW, Shewry PR, Napier JA. 1997. Expression of a borage desaturase cDNA containing an N-terminal cytochrome b5 domain results in the accumulation of high levels of delta6-desaturated fatty acids in transgenic tobacco. *Proceedings of the National Academy of Sciences of the United States of America* 94(8): 4211-4216.

Pubmed: [Author and Title](#)

Google Scholar: [Author Only](#) [Title Only](#) [Author and Title](#)

Serodio J, Vieira S, Cruz S, Coelho H. 2006. Rapid light-response curves of chlorophyll fluorescence in microalgae: relationship to steady-state light curves and non-photochemical quenching in benthic diatom-dominated assemblages. *Photosynth Res* 90(1): 29-43.

Pubmed: [Author and Title](#)

Google Scholar: [Author Only](#) [Title Only](#) [Author and Title](#)

Shi H, Chen H, Gu Z, Song Y, Zhang H, Chen W, Chen YQ. 2015. Molecular mechanism of substrate specificity for delta 6 desaturase from *Mortierella alpina* and *Micromonas pusilla*. *J Lipid Res* 56(12): 2309-2321.

Pubmed: [Author and Title](#)

Google Scholar: [Author Only](#) [Title Only](#) [Author and Title](#)

Song L-Y, Zhang Y, Li S-F, Hu J, Yin W-B, Chen Y-H, Hao S-T, Wang B-L, Wang RRC, Hu Z-M. 2014. Identification of the substrate recognition region in the  $\Delta^6$ -fatty acid and  $\Delta^8$ -sphingolipid desaturase by fusion mutagenesis. *Planta* 239(4): 753-763.

Pubmed: [Author and Title](#)

Google Scholar: [Author Only](#) [Title Only](#) [Author and Title](#)

Tardif M, Atteia A, Specht M, Cogne G, Rolland N, Brugiére S, Hippler M, Ferro M, Bruley C, Peltier G, et al. 2012. PredAlgo: a new subcellular localization prediction tool dedicated to green algae. *Mol Biol Evol* 29(12): 3625-3639.

Pubmed: [Author and Title](#)

Google Scholar: [Author Only](#) [Title Only](#) [Author and Title](#)

Tasaka Y, Gombos Z, Nishiyama Y, Mohanty P, Ohba T, Ohki K, Murata N. 1996. Targeted mutagenesis of acyl-lipid desaturases in *Synechocystis*: evidence for the important roles of polyunsaturated membrane lipids in growth, respiration and photosynthesis. *Embo J* 15(23): 6416-6425.

Pubmed: [Author and Title](#)  
Google Scholar: [Author Only](#) [Title Only](#) [Author and Title](#)

**Tonon T, Sayanova O, Michaelson LV, Qing R, Harvey D, Larson TR, Li Y, Napier JA, Graham IA. 2005. Fatty acid desaturases from the microalga *Thalassiosira pseudonana*. *Febs J* 272(13): 3401-3412.**

Pubmed: [Author and Title](#)  
Google Scholar: [Author Only](#) [Title Only](#) [Author and Title](#)

**Vijayan P, Browse J. 2002. Photoinhibition in mutants of *Arabidopsis* deficient in thylakoid unsaturation. *Plant Physiol* 129(2): 876-885.**

Pubmed: [Author and Title](#)  
Google Scholar: [Author Only](#) [Title Only](#) [Author and Title](#)

**Voinnet O, Rivas S, Mestre P, Baulcombe D. 2003. An enhanced transient expression system in plants based on suppression of gene silencing by the p19 protein of tomato bushy stunt virus. *Plant J* 33(5): 949-956.**

Pubmed: [Author and Title](#)  
Google Scholar: [Author Only](#) [Title Only](#) [Author and Title](#)

**Wagner M, Hoppe K, Czabany T, Heilmann M, Daum G, Feussner I, Fulda M. 2010. Identification and characterization of an acyl-CoA:diacylglycerol acyltransferase 2 (DGAT2) gene from the microalga *O. tauri*. *Plant Physiol Biochem* 48(6): 407-416.**

Pubmed: [Author and Title](#)  
Google Scholar: [Author Only](#) [Title Only](#) [Author and Title](#)

**Wang H, Klein MG, Zou H, Lane W, Snell G, Levin I, Li K, Sang BC. 2015. Crystal structure of human stearoyl-coenzyme A desaturase in complex with substrate. *Nat Struct Mol Biol* 22(7): 581-585.**

Pubmed: [Author and Title](#)  
Google Scholar: [Author Only](#) [Title Only](#) [Author and Title](#)

**Wang K, Froehlich JE, Zienkiewicz A, Hersh HL, Benning C. 2017. A Plastid Phosphatidylglycerol Lipase Contributes to the Export of Acyl Groups from Plastids for Seed Oil Biosynthesis. *Plant Cell* 29(7): 1678-1696.**

Pubmed: [Author and Title](#)  
Google Scholar: [Author Only](#) [Title Only](#) [Author and Title](#)

**Wang M, Chen H, Gu Z, Zhang H, Chen W, Chen YQ. 2013. omega3 fatty acid desaturases from microorganisms: structure, function, evolution, and biotechnological use. *Appl Microbiol Biotechnol* 97(24): 10255-10262.**

Pubmed: [Author and Title](#)  
Google Scholar: [Author Only](#) [Title Only](#) [Author and Title](#)

**Watanabe K, Ohno M, Taguchi M, Kawamoto S, Ono K, Aki T. 2016. Identification of amino acid residues that determine the substrate specificity of mammalian membrane-bound front-end fatty acid desaturases. *J Lipid Res* 57(1): 89-99.**

Pubmed: [Author and Title](#)  
Google Scholar: [Author Only](#) [Title Only](#) [Author and Title](#)

**Williams JGK 1988. [85] Construction of specific mutations in photosystem II photosynthetic reaction center by genetic engineering methods in *Synechocystis* 6803. *Methods in Enzymology*: Academic Press, 766-778.**

Pubmed: [Author and Title](#)  
Google Scholar: [Author Only](#) [Title Only](#) [Author and Title](#)

**Yang W, Wittkopp TM, Li X, Warakanont J, Dubini A, Catalanotti C, Kim RG, Nowack EC, Mackinder LC, Aksoy M, et al. 2015. Critical role of *Chlamydomonas reinhardtii* ferredoxin-5 in maintaining membrane structure and dark metabolism. *Proc Natl Acad Sci U S A* 112(48): 14978-14983.**

Pubmed: [Author and Title](#)  
Google Scholar: [Author Only](#) [Title Only](#) [Author and Title](#)

**Zauner S, Jochum W, Bigorowski T, Benning C. 2012. A cytochrome b5-containing plastid-located fatty acid desaturase from *Chlamydomonas reinhardtii*. *Eukaryot Cell* 11(7): 856-863.**

Pubmed: [Author and Title](#)  
Google Scholar: [Author Only](#) [Title Only](#) [Author and Title](#)
